# Supplementary material for: Alliance of Proteomics and Genomics to Unravel the Specificities of Sahara Bacterium Deinococcus deserti
Source: PLoS Genet. 2009 Mar 27;5(3):e1000434. doi: 10.1371/journal.pgen.1000434 (PMC2669436; doi:10.1371/journal.pgen.1000434)
Supplement: Figure S1 — Evidence for correct annotation of Deide_15980. Deide_15980 proteogenomic annotation with four peptides detected by mass spectrometry (A). Multiple sequence alignments of Deide_15980 and homologs found encoded in the reverse orientation of DR_0869 and Dgeo_0511 (B). Multiple sequence alignments of incorrectly predicted DR_0869 and Dgeo_0511 with a protein found when the orientation of Deide_15980 is reversed (C). Identified peptides for Deide_15980 are indicated with black and blue bars in (A). The peptide sequences can be found in Table S3. (0.07 MB PDF) [file pgen.1000434.s001.pdf]

**A**

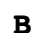

**C**

|                       |                                                               |     |
|-----------------------|---------------------------------------------------------------|-----|
| <b>revDeide_15980</b> | -----CATDHPP                                                  | 7   |
| DR_0869               | MAQRWRSKRQSGPLAPCLLSLPSVAVAAAVGRWHRSPGGLRQGFLLHHGRLVRLVAANHLT | 60  |
| Dgeo_0511             | -----MRE-----DRCSPLQTKHAA                                     | 15  |
|                       | :.*.                                                          |     |
| <b>revDeide_15980</b> | QFLDDLLALLIIDLLAAYAQEAPFLRCLRCTFHNLDQHLLVCGGVFLAGFTADQPDCLTHS | 67  |
| DR_0869               | QFVHHGAFLLVVDLFAADAQEAAFLRGVRGVFHHLEQHLAVSGGVFGARLAAHQPRGLPHA | 120 |
| Dgeo_0511             | QFIQHGTFLLLTHLLAAKAQKATLLGGPGSALGHGPKQAAVGGGILWAGLAVHQPDGLPHA | 75  |
|                       | ***.. :*: .*:** ***:.*:*                                      |     |
|                       | : : : : *                                                     |     |
|                       | ***: *                                                        |     |
|                       | :...*                                                         |     |
|                       | *.*:                                                          |     |
| <b>revDeide_15980</b> | LNALGHGFFHIAGLFLWQRLRICRRAHQVSCDSFHQGAACPADVLTHAGGNSLRFSQQ    | 127 |
| DR_0869               | LNALRFDLFHVAG-VLLGQVLGVGRGAEQFGGHRHLHQRARRAADTFAHGSGNRLRFGEQ  | 179 |
| Dgeo_0511             | LQALRAGFFQVAGPFLPCQHLGVGRRTQQIGGHRLOQRSTLSAHLLANRLRDGLRLRHQ   | 135 |
|                       | *:** .*:***.* ** : * :*. . :*                                 |     |
|                       | : .*                                                          |     |
|                       | :: :                                                          |     |
|                       | : **:                                                         |     |
|                       | .*                                                            |     |
| <b>revDeide_15980</b> | AGQAAGAGCHDGGSRPARTGHDFEPLVCREVVFYAHKASLVT-----               | 169 |
| DR_0869               | PGQSAGAGGDHSGPRAAWPGHDLPLVCREVVFYAHAASFNG-----                | 221 |
| Dgeo_0511             | ASQATGAGRHRRACPAGTVHHREPLLRKIVLDAHAITLNGRENPLVGAFTGSESTSS     | 195 |
|                       | ..*::*** .. .*. *. ***: **:*: ** :                            |     |
| <b>revDeide_15980</b> | ----GWPYAYWAFIYP----                                          | 181 |
| DR_0869               | ----SCSFRRL-----                                              | 228 |
| Dgeo_0511             | SISLSLPFPPLSRLTSTLRA                                          | 215 |
