# Supplementary material for: Alliance of Proteomics and Genomics to Unravel the Specificities of Sahara Bacterium Deinococcus deserti
Source: PubMed Central journal article supplement (PMC2669436; doi:10.1371/journal.pgen.1000434), 2009-03-27

Figure S3

A

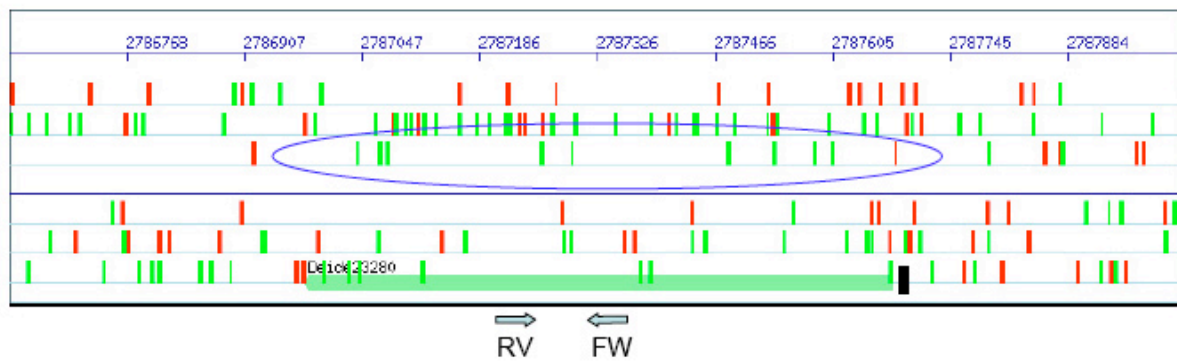

B

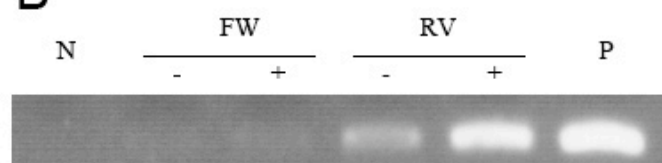

Supplement: pgen.1000434.s003.pdf [file pgen.1000434.s003.pdf]
