# Supplementary material for: Alliance of Proteomics and Genomics to Unravel the Specificities of Sahara Bacterium Deinococcus deserti
Source: PubMed Central journal article supplement (PMC2669436; doi:10.1371/journal.pgen.1000434), 2009-03-27
Supplement: pgen.1000434.s004.pdf [file pgen.1000434.s004.pdf]

## Figure S4

### A

```
Deide_20641 -----MTNPYAWEFQRLRKEYGEQLGSMPLPEGLPEHLRALIDQHDEEAIQFMIK 50
Dgeo_0322 -----MTNPYAWEFQRLRAEYGEQLKAMPLPDGLPEYLRDLIEARDEEAILFMIK 50
revDR_0438 MPKPSVSSQPAPNPYAWEFQRLRSEYGDQLSAMPLPDGLPEHLRNLI EQGDEDAIQFMVR 60
               .***** **:* :*:*:*:*:** **:* **:* **:*:

Deide_20641 LAWQFGAQVGYAAGSRQNAAPAYPRPGRVQA 82
Dgeo_0322 LAWQFGAQVGYAAGARQGQAARPTTRPGHVQA 82
revDR_0438 LAWQLGAQVGYAAGSRRQDVHAPPKRSQNVQA 92
               ****:*:*****:*: . . *.*.***
```

### B

```
DR_0438 -----MHVLA-----AAAGVVDLGAELPGEFDHKLNGVLLVALLDQVSQVL 41
revDgeo_0322 VGAVLRSSLDVTRPGRGSGRLSLSGSGGVTHLGPPELPGKFDHKQDGGFFVPRLDQVAQIL 60
revDeide_20641 -----VGSGLNAARPWVSRRCRILSASGGIAHLRAKLPQFDHELNSFFVMLINQGPQMF 55
               :.. :*:*:*. *:*: **:* :*:*. **:* .*:

DR_0438 GQTVGQGHGAELVAVFAELLEPLGVRVRRGLARDGRLRHGLNLTQAHSRNVSQKAV 98
revDgeo_0322 REAVGKRHGLELLAVLRAELLEPLGVGIR-----HTSILTPTHSRNVSGAKG 107
revDeide_20641 WQPFQWHGPELLTILLAKLLEPLGIGVR-----HVSYLNITALKECNSGS- 101
               :..*:* ** *:*: :*:*****: * * * . : : .
```
