# Supplementary material for: Alliance of Proteomics and Genomics to Unravel the Specificities of Sahara Bacterium Deinococcus deserti
Source: PubMed Central journal article supplement (PMC2669436; doi:10.1371/journal.pgen.1000434), 2009-03-27
Supplement: pgen.1000434.s011.pdf [file pgen.1000434.s011.pdf]

| <b>Table S6. Mn/Fe ratio in <i>D. deserti</i> and <i>D. radiodurans</i></b> |                   |                       |                                      |                       |
|-----------------------------------------------------------------------------|-------------------|-----------------------|--------------------------------------|-----------------------|
|                                                                             | TSB/10            |                       | TSB/10 + trace elements <sup>c</sup> |                       |
|                                                                             | <i>D. deserti</i> | <i>D. radiodurans</i> | <i>D. deserti</i>                    | <i>D. radiodurans</i> |
| Mn <sup>a</sup>                                                             | 0.38              | 0.15                  | 2.04                                 | 0.66                  |
| Fe <sup>a</sup>                                                             | 0.7               | 0.89                  | 1.9                                  | 1.43                  |
| Mn/Fe <sup>b</sup>                                                          | 0.54              | 0.16                  | 1.05                                 | 0.47                  |

<sup>a</sup> In nmol/mg dry weight. Strains were grown in tenfold diluted tryptic soy broth (TSB/10) or TSB/10 supplemented with trace elements, washed in PBS containing 1 mM EDTA, and cells were dried at 60°C for 48 h, and subjected to ICP-AES.

<sup>b</sup> The Mn/Fe ratio in TSB/10 + trace elements is 0.19; Mn and Fe in TSB/10 were below the detection limit.

<sup>c</sup> Vujičić-Žagar A, Dulermo R, Le Gorrec M, Vannier F, Servant P, et al. (2009) Crystal structure of the IrrE protein, a central regulator of DNA damage repair in Deinococcaceae. J Mol Biol. In Press.
