# Supplementary material for: Alliance of Proteomics and Genomics to Unravel the Specificities of Sahara Bacterium Deinococcus deserti
Source: PubMed Central journal article supplement (PMC2669436; doi:10.1371/journal.pgen.1000434), 2009-03-27
Supplement: pgen.1000434.s014.pdf [file pgen.1000434.s014.pdf]

| Table S9. ABC transporters in <i>D. deserti</i> |                                                             |      |                                        |                         |                                                                     |                     |
|-------------------------------------------------|-------------------------------------------------------------|------|----------------------------------------|-------------------------|---------------------------------------------------------------------|---------------------|
| COG number                                      | Protein annotation                                          | Name | <i>D. radiodurans</i>                  | <i>D. geothermalis</i>  | <i>D. deserti</i>                                                   | Spectral count      |
| COG0747                                         | ABC-type dipeptide transport system (periplasmic component) | DdpA | DR_A0210                               | Dgeo_2510               | Deide_2p00290                                                       | 112                 |
| COG0747                                         | ABC-type dipeptide transport system (periplasmic component) | DdpA | DR_1571                                | Dgeo_1344               | Deide_3p01890,<br>Deide_11060                                       | 73<br>596           |
| COG0747                                         | ABC-type dipeptide transport system (periplasmic component) | DdpA | -                                      | -                       | Deide_1p01230,<br>Deide_3p01130                                     | 0<br>6              |
| COG0747                                         | ABC-type dipeptide transport system (periplasmic component) | DdpA | -                                      | Dgeo_0324               | -                                                                   |                     |
| COG0747                                         | ABC-type dipeptide transport system (periplasmic component) | DdpA | -                                      | -                       | Deide_3p00570,<br>Deide_1p01480,<br>Deide_3p00780,<br>Deide_3p02230 | 0<br>167<br>10<br>4 |
| COG0747                                         | ABC-type dipeptide transport system (periplasmic component) | DdpA | -                                      | -                       | Deide_3p00722                                                       | 0                   |
| COG0747                                         | ABC-type dipeptide transport system (periplasmic component) | DdpA | DR_0363,<br>DR_0986                    | Dgeo_2122,<br>Dgeo_0554 | Deide_19110,<br>Deide_06270                                         | 683<br>0            |
| COG0747                                         | ABC-type dipeptide transport system (periplasmic component) | DdpA | DR_1290, DR_A0246,<br>DR_1712, DR_1955 |                         | Deide_10250,<br>Deide_3p02270                                       | 89<br>14            |
| COG0601                                         | ABC-type dipeptide transport system (permease component)    | DppB | -                                      | -                       | Deide_1p01490                                                       | 2                   |
| COG0601                                         | ABC-type dipeptide transport system (permease component)    | DppB | -                                      | -                       | Deide_1p01220                                                       | 0                   |
| COG0601                                         | ABC-type dipeptide transport system (permease component)    | DppB | DR_A0209                               | Dgeo_2511               | Deide_2p00280                                                       | 0                   |
| COG0601                                         | ABC-type dipeptide transport system (permease component)    | DppB | -                                      | Dgeo_0325               | -                                                                   |                     |
| COG0601                                         | ABC-type dipeptide transport system (permease component)    | DppB | DR_0959                                | Dgeo_1190               | Deide_10240                                                         | 4                   |

|                |                                                                              |             |                 |                  |                      |          |
|----------------|------------------------------------------------------------------------------|-------------|-----------------|------------------|----------------------|----------|
| <b>COG0601</b> | ABC-type dipeptide/oligopeptide/nickel transport system (permease component) | <b>DppB</b> | -               | -                | <b>Deide_3p01120</b> | <b>0</b> |
| <b>COG0601</b> | ABC-type dipeptide/oligopeptide/nickel transport system (permease component) | <b>DppB</b> | -               | -                | <b>Deide_3p00790</b> | <b>0</b> |
| <b>COG0601</b> | ABC-type dipeptide/oligopeptide/nickel transport system (permease component) | <b>DppB</b> | -               | -                | <b>Deide_3p00580</b> | <b>0</b> |
| <b>COG0601</b> | ABC-type dipeptide/oligopeptide/nickel transport system (permease component) | <b>DppB</b> | -               | -                | <b>Deide_3p02240</b> | <b>0</b> |
| <b>COG0601</b> | ABC-type dipeptide/oligopeptide/nickel transport system (permease component) | <b>DppB</b> | <b>DR_0364</b>  | <b>Dgeo_2123</b> | <b>Deide_19120</b>   | <b>7</b> |
| <b>COG0601</b> | ABC-type dipeptide/oligopeptide/nickel transport system (permease component) | <b>DppB</b> | <b>DR_1570</b>  | <b>Dgeo_1343</b> | <b>Deide_11070</b>   | <b>0</b> |
| <b>COG1173</b> | ABC-type oligopeptide transport system (permease component)                  | <b>DppC</b> | <b>DR_A0208</b> | <b>Dgeo_2512</b> | <b>Deide_2p00270</b> | <b>0</b> |
| <b>COG1173</b> | ABC-type dipeptide transport system (permease component)                     | <b>DppC</b> | -               | <b>Dgeo_0326</b> | -                    | <b>0</b> |
| <b>COG1173</b> | ABC-type dipeptide transport system (permease component)                     | <b>DppC</b> | -               | -                | <b>Deide_1p01210</b> | <b>0</b> |
| <b>COG1173</b> | ABC-type dipeptide transport system (permease component)                     | <b>DppC</b> | -               | -                | <b>Deide_3p02250</b> | <b>0</b> |
| <b>COG1173</b> | ABC-type dipeptide transport system (permease component)                     | <b>DppC</b> | -               | -                | <b>Deide_1p01500</b> | <b>0</b> |
| <b>COG1173</b> | ABC-type dipeptide transport system (permease component)                     | <b>DppC</b> | <b>DR_0958</b>  | <b>Dgeo_1191</b> | <b>Deide_10230</b>   | <b>2</b> |

|         |                                                                              |      |         |           |               |    |
|---------|------------------------------------------------------------------------------|------|---------|-----------|---------------|----|
| COG1173 | ABC-type dipeptide/oligopeptide/nickel transport system (permease component) | DppC | -       | -         | Deide_3p01110 | 0  |
| COG1173 | ABC-type dipeptide/oligopeptide/nickel transport system (permease component) | DppC | -       | -         | Deide_3p00800 | 0  |
| COG1173 | ABC-type dipeptide/oligopeptide/nickel transport system (permease component) | DppC | -       | -         | Deide_3p00590 | 0  |
| COG1173 | ABC-type dipeptide/oligopeptide/nickel transport system (permease component) | DppC | DR_0365 | Dgeo_2124 | Deide_19130   | 0  |
| COG1173 | ABC-type dipeptide/oligopeptide/nickel transport system (permease component) | DppC | DR_1569 | Dgeo_1342 | Deide_11080   | 2  |
| COG0444 | ABC-type dipeptide/oligopeptide/nickel transport system (ATPase component)   | DppD | DR_1568 | Dgeo_1341 | Deide_11090   | 29 |
| COG0444 | ABC-type dipeptide/oligopeptide/Nickel transport system (ATPase component)   | DppD | -       | -         | Deide_3p00600 | 0  |
| COG4608 | ABC-type oligopeptide transport system (ATPase component)                    | AppF | DR_1567 | Dgeo_1340 | Deide_11100   | 41 |
| COG4608 | ABC-type oligopeptide transport system (ATPase component)                    | AppF | -       | -         | Deide_3p00610 | 0  |
| COG4177 | ABC-type branch-chain amino acid transport system (permease component)       | LivM | -       | Dgeo_2032 | Deide_04750   | 0  |
| COG4177 | ABC-type branch-chain amino acid transport system (permease component)       | LivM | -       | -         | Deide_14430   | 0  |

|         |                                                                                       |      |          |           |               |   |
|---------|---------------------------------------------------------------------------------------|------|----------|-----------|---------------|---|
| COG4177 | ABC-type branch-chain amino acid transport system (permease component)                | LivM | -        | Dgeo_0801 | Deide_14790   | 0 |
| COG4177 | ABC-type branch-chain amino acid transport system (permease component)                | LivM | -        | -         | Deide_12200   | 0 |
| COG4177 | ABC-type branch-chain amino acid transport system (permease component)                | LivM | DR_0282  | Dgeo_2167 | Deide_20470   | 0 |
| COG4177 | ABC-type branch-chain amino acid transport system (permease component)                | LivM | DR_1036  | Dgeo_1207 | Deide_12610   | 3 |
| COG4177 | ABC-type branch-chain amino acid transport system (permease component)                | LivM | DR_2120  | Dgeo_0733 | Deide_07000   | 0 |
| COG0559 | ABC-type short chain or branch-chain amino acid transport system (permease component) | LivH | -        | Dgeo_0802 | Deide_14800   | 0 |
| COG0559 | ABC-type short chain or branch-chain amino acid transport system (permease component) | LivH | -        | Dgeo_2031 | Deide_04760   | 0 |
| COG0559 | ABC-type short chain or branch-chain amino acid transport system (permease component) | LivH | -        | -         | Deide_12210   | 0 |
| COG0559 | ABC-type short chain or branch-chain amino acid transport system (permease component) | LivH | -        | -         | Deide_14440   | 0 |
| COG0559 | ABC-type short chain or branch-chain amino acid transport system (permease component) | LivH | DR_A0262 | Dgeo_2424 | Deide_2p00160 | 0 |
| COG0559 | ABC-type short chain or branch-chain amino acid transport system (permease component) | LivH | DR_0281  | Dgeo_2166 | Deide_20460   | 0 |
| COG0559 | ABC-type short chain or branch-chain amino acid transport system (permease component) | LivH | DR_2121  | Dgeo_0734 | Deide_07010   | 0 |

|         |                                                                                       |      |                    |                                     |                                           |               |
|---------|---------------------------------------------------------------------------------------|------|--------------------|-------------------------------------|-------------------------------------------|---------------|
| COG0559 | ABC-type short chain or branch-chain amino acid transport system (permease component) | LivH | DR_1037            | Dgeo_1206                           | Deide_12600                               | 1             |
| COG0683 | ABC-type branch-chain amino acid transport system (periplasmic component)             | LivK | -                  | -                                   | Deide_12220                               | 60            |
| COG0683 | ABC-type branch-chain amino acid transport system (periplasmic component)             | LivK | -                  | -                                   | Deide_14420                               | 32            |
| COG0683 | ABC-type branch-chain amino acid transport system (periplasmic component)             | LivK | DR_1038<br>DR_0788 | Dgeo_1205<br>Dgeo_1636<br>Dgeo_0620 | Deide_12590<br>Deide_14600<br>Deide_17040 | 389<br>0<br>0 |
| COG0683 | ABC-type branch-chain amino acid transport system (periplasmic component)             | LivK | -                  | Dgeo_0806                           | Deide_14810                               | 19            |
| COG0683 | ABC-type branch-chain amino acid transport system (periplasmic component)             | LivK | -                  | Dgeo_2030                           | Deide_04770                               | 49            |
| COG0683 | ABC-type branch-chain amino acid transport system (periplasmic component)             | LivK | DR_A0263           | Dgeo_2411                           | Deide_2p00130                             | 25            |
| COG0683 | ABC-type branch-chain amino acid transport system (periplasmic component)             | LivK | DR_A0260           | Dgeo_2426                           | Deide_2p00140                             | 4             |
| COG0683 | ABC-type branch-chain amino acid transport system (periplasmic component)             | LivK | DR_0280            | Dgeo_2165                           | Deide_20450                               | 132           |
| COG0683 | ABC-type branch-chain amino acid transport system (periplasmic component)             | LivK | DR_2122            | Dgeo_0735                           | Deide_07020                               | 18            |
| COG0410 | ABC-type branch-chain amino acid transport system (ATPase component)                  | LivF | -                  | -                                   | Deide_14410                               | 0             |
| COG0410 | ABC-type branch-chain amino acid transport system (ATPase component)                  | LivF | DR_1034            | Dgeo_1209                           | Deide_12630                               | 16            |

|         |                                                                      |      |         |           |             |    |
|---------|----------------------------------------------------------------------|------|---------|-----------|-------------|----|
| COG0410 | ABC-type branch-chain amino acid transport system (ATPase component) | LivF | -       | Dgeo_0799 | Deide_14770 | 0  |
| COG0410 | ABC-type branch-chain amino acid transport system (ATPase component) | LivF | -       | Dgeo_2029 | Deide_04780 | 0  |
| COG0410 | ABC-type branch-chain amino acid transport system (ATPase component) | LivF | -       | -         | Deide_12180 | 0  |
| COG0410 | ABC-type branch-chain amino acid transport system (ATPase component) | LivF | DR_0284 | Dgeo_2169 | Deide_20490 | 0  |
| COG0410 | ABC-type branch-chain amino acid transport system (ATPase component) | LivF | DR_2118 | Dgeo_0731 | Deide_06980 | 4  |
| COG0411 | ABC-type branch-chain amino acid transport system (ATPase component) | LivG | -       | -         | Deide_12190 | 0  |
| COG0411 | ABC-type branch-chain amino acid transport system (ATPase component) | LivG | -       | -         | Deide_14460 | 1  |
| COG0411 | ABC-type branch-chain amino acid transport system (ATPase component) | LivG | DR_0283 | Dgeo_2168 | Deide_20480 | 1  |
| COG0411 | ABC-type branch-chain amino acid transport system (ATPase component) | LivG | DR_1035 | Dgeo_1208 | Deide_12620 | 27 |
| COG0411 | ABC-type branch-chain amino acid transport system (ATPase component) | LivG | -       | Dgeo_0800 | Deide_14780 | 0  |
| COG0411 | ABC-type branch-chain amino acid transport system (ATPase component) | LivG | -       | Dgeo_2028 | Deide_04790 | 0  |
| COG0411 | ABC-type branch-chain amino acid transport system (ATPase component) | LivG | DR_2119 | Dgeo_0732 | Deide_06990 | 0  |

|                     |                                                                                 |           |                                           |                                     |                                                                               |                            |
|---------------------|---------------------------------------------------------------------------------|-----------|-------------------------------------------|-------------------------------------|-------------------------------------------------------------------------------|----------------------------|
| COG4177-<br>COG0411 | ABC-type branch-chain amino acid transport system (permease - ATPase component) | LivM-LivG | DR_A0261                                  | Dgeo_2425                           | Deide_2p00150                                                                 | 0                          |
| COG0834             | ABC-type amino acid transport system (periplasmic component)                    | HisJ      | DR_2154<br>DR_2610<br>DR_B0078<br>DR_0564 | Dgeo_2189<br>Dgeo_1060<br>Dgeo_1986 | Deide_05450<br>Deide_07680<br>Deide_2p01060<br>Deide_3p00160<br>Deide_3p00200 | 3<br>100<br>1<br>10<br>165 |
| COG0765             | ABC-type amino acid transport system permease component)                        | HisM      | DR_2155<br>DR_1028                        | Dgeo_1061                           | Deide_07690                                                                   | 0                          |
| COG1126             | ABC-type polar amino acid transport system (ATPase component)                   | GlnQ      | DR_1648                                   | Dgeo_1064                           | Deide_07730                                                                   | 3                          |
| COG1174             | ABC-type proline/glycine betaine transport system (permease component)          | OpuBB     | DR_A0138                                  | Dgeo_0171                           | Deide_00160                                                                   | 0                          |
| COG1174             | ABC-type proline/glycine betaine transport system (permease component)          | OpuBB     | DR_A0136                                  | Dgeo_0173                           | Deide_00180                                                                   | 0                          |
| COG1125             | ABC-type proline/glycine betaine transport system (ATPase component)            | OpuBA     | DR_A0137                                  | Dgeo_0172                           | Deide_00170                                                                   | 0                          |
| COG1732             | ABC-type glycine betaine/choline transport system (periplasmic component)       | OpuBC     | DR_A0135                                  | Dgeo_0174                           | Deide_00190                                                                   | 22                         |
|                     |                                                                                 |           |                                           |                                     |                                                                               |                            |
| COG1131             | ABC-type multidrug transport system (ATPase component)                          | CcmA      | DR_2316                                   | Dgeo_0381                           | Deide_21040                                                                   | 0                          |
| COG1131             | ABC-type multidrug transport system (ATPase component)                          | CcmA      | DR_1012                                   | Dgeo_1811                           | Deide_17730                                                                   | 5                          |
| COG1131             | ABC-type multidrug transport system (ATPase component)                          | CcmA      | -                                         | -                                   | Deide_08880                                                                   | 0                          |
| COG1131             | ABC-type multidrug transport system (ATPase component)                          | CcmA      | DR_0406                                   | Dgeo_1242                           | Deide_08340                                                                   | 0                          |
| COG1132             | ABC-type multidrug transport system (ATPase & permease components)              | MdIB      | DR_2051<br>DR_A0349                       | Dgeo_0647<br>Dgeo_1385              | Deide_06130                                                                   | 0                          |

|         |                                                                    |      |         |                        |                                |          |
|---------|--------------------------------------------------------------------|------|---------|------------------------|--------------------------------|----------|
| COG1132 | ABC-type multidrug transport system (ATPase & permease components) | MdlB | DR_2052 | Dgeo_0648              | Deide_06140                    | 1        |
| COG1132 | ABC-type multidrug transport system (ATPase & permease components) | MdlB | DR_0163 | -                      | Deide_00460                    | 0        |
| COG1132 | ABC-type multidrug transport system (ATPase & permease components) | MdlB | DR_0096 | -                      | Deide_19830                    | 0        |
| COG1132 | ABC-type multidrug transport system (ATPase & permease components) | MdlB | DR_0095 | -                      | Deide_19840                    | 0        |
|         |                                                                    |      |         |                        |                                |          |
| COG1175 | ABC-type sugar transport system (permease component)               | UgpA | DR_1437 | Dgeo_0590              | Deide_14330<br>Deide_3p01820   | 0<br>0   |
| COG1175 | ABC-type sugar transport system (permease component)               | UgpA | -       | Dgeo_1168<br>Dgeo_2918 | Deide_13600<br>Deide_3p01660   | 0<br>0   |
| COG1175 | ABC-type sugar transport system (permease component)               | UgpA | DR_0562 | Dgeo_1501              | Deide_09490                    | 0        |
| COG1175 | ABC-type sugar transport system (permease component)               | UgpA | -       | Dgeo_0906              | Deide_05060                    | 0        |
| COG1175 | ABC-type sugar transport system (permease component)               | UgpA | -       | Dgeo_2820              | Deide_1p01610<br>Deide_3p00100 | 0<br>0   |
| COG1175 | ABC-type sugar transport system (permease component)               | UgpA | -       | Dgeo_2725              | Deide_02540                    | 0        |
| COG1175 | ABC-type sugar transport system (permease component)               | UgpA | -       | Dgeo_2695<br>Dgeo_2918 | Deide_3p00980<br>Deide_3p01950 | 0<br>0   |
| COG1175 | ABC-type sugar transport system (permease component)               | UgpA | -       | Dgeo_2869              | Deide_3p02100                  | 0        |
| COG1175 | ABC-type sugar transport system (permease component)               | UgpA | -       | Dgeo_2860              | Deide_00570                    | 0        |
| COG1175 | ABC-type sugar transport system (permease component)               | UgpA | -       | -                      | Deide_1p00650                  | 0        |
| COG1653 | ABC-type sugar transport system (periplasmic component)            | UgpB | DR_1438 | Dgeo_0591              | Deide_14320<br>Deide_2p01740   | 564<br>3 |



|         |                                                         |      |         |                        |                                                 |               |
|---------|---------------------------------------------------------|------|---------|------------------------|-------------------------------------------------|---------------|
| COG1653 | ABC-type sugar transport system (periplasmic component) | UgpB | -       | Dgeo_2821              | Deide_1p01600<br>Deide_3p00090<br>Deide_3p00990 | 0<br>15<br>16 |
| COG1653 | ABC-type sugar transport system (periplasmic component) | UgpB | -       | -                      | Deide_3p01810                                   | 16            |
| COG1653 | ABC-type sugar transport system (periplasmic component) | UgpB | -       | Dgeo_2870              | Deide_3p02090                                   | 55            |
| COG1653 | ABC-type sugar transport system (periplasmic component) | UgpB | -       | Dgeo_2696              | Deide_3p01960                                   | 16            |
| COG1653 | ABC-type sugar transport system (periplasmic component) | UgpB | -       | Dgeo_0905              | Deide_05050                                     | 1128          |
| COG1653 | ABC-type sugar transport system (periplasmic component) | UgpB | -       | -                      | Deide_3p01640                                   | 0             |
| COG1653 | ABC-type sugar transport system (periplasmic component) | UgpB | -       | -                      | Deide_03790                                     | 0             |
| COG1653 | ABC-type sugar transport system (periplasmic component) | UgpB | -       | -                      | Deide_1p00660                                   | 44            |
| COG1653 | ABC-type sugar transport system (periplasmic component) | UgpB | -       | Dgeo_2726<br>Dgeo_2919 | Deide_02550                                     | 183           |
| COG1653 | ABC-type sugar transport system (periplasmic component) | UgpB | -       | Dgeo_2859              | Deide_00580                                     | 3             |
| COG1653 | ABC-type sugar transport system (periplasmic component) | UgpB | -       | Dgeo_0687              | Deide_10270                                     | 35            |
| COG0395 | ABC-type sugar transport system (permease component)    | UgpE | DR_1436 | Dgeo_0589              | Deide_14340                                     | 1             |
| COG0395 | ABC-type sugar transport system (permease component)    | UgpE | -       | -                      | Deide_1p00640                                   | 0             |
| COG0395 | ABC-type sugar transport system (permease component)    | UgpE | -       | Dgeo_2694              | Deide_3p01940                                   | 0             |
| COG0395 | ABC-type sugar transport system (permease component)    | UgpE | -       | Dgeo_2917              | Deide_3p01650                                   | 0             |
| COG0395 | ABC-type sugar transport system (permease component)    | UgpE | -       | Dgeo_1169<br>Dgeo_2724 | Deide_13610                                     | 0             |

|         |                                                           |      |         |           |                                                                  |                  |
|---------|-----------------------------------------------------------|------|---------|-----------|------------------------------------------------------------------|------------------|
| COG0395 | ABC-type sugar transport system (permease component)      | UgpE | -       | Dgeo_2818 | Deide_1p01620<br>Deide_3p00110<br>Deide_3p00970<br>Deide_3p01830 | 0<br>0<br>0<br>0 |
| COG0395 | ABC-type sugar transport system (permease component)      | UgpE | -       | Dgeo_0907 | Deide_05070                                                      | 0                |
| COG0395 | ABC-type sugar transport system (permease component)      | UgpE | -       | Dgeo_2724 | Deide_02530                                                      | 0                |
| COG0395 | ABC-type sugar transport system (permease component)      | UgpE | -       | Dgeo_2868 | Deide_3p02110                                                    | 0                |
| COG0395 | ABC-type sugar transport system (permease component)      | UgpE | -       | Dgeo_2861 | Deide_00560                                                      | 0                |
| COG1137 | ABC-type unclassified transport system (ATPase component) | HhbG | DR_2134 | Dgeo_0587 | Deide_03770                                                      | 0                |
| COG3833 | ABC-type sugar transport system (permease component)      | MalG | DR_0563 | Dgeo_1502 | Deide_09480                                                      | 0                |
| COG2182 | ABC-type sugar transport system (periplasmic component)   | MalE | DR_0561 | -         | Deide_09500                                                      | 249              |
| COG3839 | ABC-type sugar transport system (ATPase component)        | MalK | DR_2153 | Dgeo_1059 | Deide_07670                                                      | 68               |
| COG1129 | ABC-type sugar transport system (ATPase component)        | MglA | -       | Dgeo_2458 | Deide_3p01510 /<br>Deide_3p01501                                 | 0                |
| COG1129 | ABC-type sugar transport system (ATPase component)        | MglA | -       | -         | Deide_3p02590                                                    | 0                |
| COG1879 | ABC-type sugar transport system (periplasmic component)   | RbsB | -       | Dgeo_2461 | Deide_3p01480                                                    | 37               |
| COG1879 | ABC-type sugar transport system (periplasmic component)   | RbsB | -       | -         | Deide_3p02570                                                    | 55               |
| COG1172 | ABC-type sugar transport system (permease component)      | AraH | -       | Dgeo_2460 | Deide_3p01490                                                    | 0                |
| COG1172 | ABC-type sugar transport system (permease component)      | AraH | -       | Dgeo_2459 | Deide_3p01500                                                    | 0                |
| COG1172 | ABC-type sugar transport system (permease component)      | AraH | -       | -         | Deide_3p02580                                                    | 0                |
| COG1172 | ABC-type sugar transport system (permease component)      | AraH | -       | -         | Deide_3p02600                                                    | 0                |

| COG1119             | ABC-type molybdenum transport system (ATPase component) / Photorepair protein PhrA        | ModF/PhrA ? | DR_2145            | Dgeo_1736 | Deide_07260   | 0  |
|---------------------|-------------------------------------------------------------------------------------------|-------------|--------------------|-----------|---------------|----|
| COG4149             | ABC-type molybdate transport system (permease component)                                  | ModC        | -                  | -         | Deide_2p02120 | 0  |
| COG0725             | ABC-type molybdate transport system (periplasmic component)                               | ModA        | -                  | -         | Deide_2p02121 | 15 |
| COG1277             | ABC-type transport system involved in multi-copper enzyme maturation (permease component) | NosY        | DR_2315            | Dgeo_0382 | Deide_21030   | 0  |
| COG1464             | ABC-type metal ion transport system (periplasmic component)                               | NlpA        | DR_1359<br>DR_1358 | -         | Deide_22340   | 34 |
| COG2011             | ABC-type metal ion transport system (permease component)                                  | AbcD        | DR_1357            | -         | Deide_22350   | 0  |
| COG1135             | ABC-type metal ion transport system (ATPase component)                                    | AbcC        | DR_1356            | -         | Deide_22360   | 0  |
| COG0715-<br>COG4521 | ABC-type nitrate/sulfonate/bicarbonate transport system (periplasmic component)           | TauA        | DR_1277            | Dgeo_1411 | Deide_13940   | 23 |
| COG0715-<br>COG4521 | ABC-type nitrate/sulfonate/bicarbonate transport system (periplasmic component)           | TauA        | DR_1655            | Dgeo_0543 | Deide_16540   | 9  |
| COG1116             | ABC-type nitrate/sulfonate/bicarbonate transport system (ATPase component)                | TauB        | DR_2198            | Dgeo_1413 | Deide_13960   | 1  |
| COG0600             | ABC-type nitrate/sulfonate/bicarbonate transport system (permease component)              | TauC        | DR_2197            | Dgeo_1412 | Deide_13950   | 0  |
| COG3842             | ABC-type spermidine/putrescine transport system (ATPase component)                        | PotA        | -                  | -         | Deide_19070   | 0  |

|         |                                                                             |      |          |           |               |    |
|---------|-----------------------------------------------------------------------------|------|----------|-----------|---------------|----|
| COG3842 | ABC-type spermidine/putrescine transport system (ATPase component)          | PotA | DR_0062  | Dgeo_1938 | Deide_15860   | 0  |
| COG4143 | ABC-type thiamine transport system (periplasmic component)                  | TbpA | DR_0262  | Dgeo_1933 | Deide_15830   | 2  |
| COG???  | ABC-type Na <sup>2+</sup> efflux pump transport system (ATPase component)   | NatA | DR_0927  | Dgeo_1675 | Deide_15090   | 4  |
| COG???  | ABC-type Na <sup>2+</sup> efflux pump transport system (permease component) | NatB | DR_0926  | Dgeo_1676 | Deide_15080   | 0  |
| COG0226 | ABC-type phosphate transport system (periplasmic component)                 | PstS | DR_A0157 | Dgeo_0649 | Deide_2p01880 | 5  |
| COG0573 | ABC-type phosphate transport system (permease component)                    | PstC | DR_A0158 | Dgeo_0650 | Deide_2p01890 | 1  |
| COG0581 | ABC-type phosphate transport system (permease component)                    | PstA | DR_A0159 | Dgeo_0651 | Deide_2p01900 | 0  |
| COG1117 | ABC-type phosphate transport system (ATPase component)                      | PstB | DR_A0160 | Dgeo_0652 | Deide_2p01910 | 3  |
| COG1136 | ABC-type antimicrobial peptide transport system (ATPase component)          | SalX | DR_0473  | Dgeo_1377 | Deide_13270   | 0  |
| COG1136 | ABC-type antimicrobial peptide transport system (ATPase component)          | SalX | DR_2192  | Dgeo_0967 | Deide_10130   | 0  |
| COG4591 | ABC-type lipoprotein transport system (permease component)                  | LoIE | DR_0474  | Dgeo_1376 | Deide_13280   | 0  |
|         |                                                                             |      |          |           |               |    |
| COG1123 | ABC-type transport system (duplicated ATPase component)                     | ?    | DR_0957  | Dgeo_1374 | Deide_08550   | 15 |
| COG0488 | ABC-type transport system (duplicated ATPase component)                     | Uup  | DR_1103  | Dgeo_0506 | Deide_16130   | 0  |
| COG0488 | ABC-type transport system (duplicated ATPase component)                     | Uup  | DR_1635  | Dgeo_0929 | Deide_05240   | 4  |
| COG1079 | uncharacterized ABC-type transport system (permease component)              | ?    | -        | Dgeo_1691 | Deide_07810   | 1  |

|                |                                                                          |                |                |                                |                    |            |
|----------------|--------------------------------------------------------------------------|----------------|----------------|--------------------------------|--------------------|------------|
| <b>COG4603</b> | <b>uncharacterized ABC-type transport system (permease component)</b>    | <b>?</b>       | <b>DR_0250</b> | <b>Dgeo_1690</b>               | <b>Deide_07820</b> | <b>0</b>   |
| <b>COG4787</b> | <b>uncharacterized ABC-type transport system (permease component)</b>    | <b>?</b>       | <b>DR_0203</b> | <b>-</b>                       | <b>Deide_08010</b> | <b>0</b>   |
| <b>COG3694</b> | <b>uncharacterized ABC-type transport system (permease component)</b>    | <b>?</b>       | <b>DR_0204</b> | <b>-</b>                       | <b>Deide_08020</b> | <b>0</b>   |
| <b>COG3694</b> | <b>uncharacterized ABC-type transport system (ATPase component)</b>      | <b>?</b>       | <b>DR_1583</b> | <b>-</b>                       | <b>Deide_10090</b> | <b>0</b>   |
| <b>COG3694</b> | <b>uncharacterized ABC-type transport system (ATPase component)</b>      | <b>?</b>       | <b>DR_0205</b> | <b>-</b>                       | <b>Deide_08030</b> | <b>0</b>   |
| <b>COG4586</b> | <b>uncharacterized ABC-type transport system (ATPase component)</b>      | <b>?</b>       | <b>DR_1581</b> | <b>-</b>                       | <b>Deide_10070</b> | <b>0</b>   |
| <b>COG4587</b> | <b>uncharacterized ABC-type transport system (permease component)</b>    | <b>?</b>       | <b>DR_1582</b> | <b>-</b>                       | <b>Deide_10080</b> | <b>0</b>   |
| <b>COG1744</b> | <b>ABC-type uncharacterized transport system (periplasmic component)</b> | <b>Med/BMP</b> | <b>DR_2070</b> | <b>Dgeo_0695<br/>Dgeo_0703</b> | <b>Deide_20440</b> | <b>132</b> |
