# Supplementary material for: Alliance of Proteomics and Genomics to Unravel the Specificities of Sahara Bacterium Deinococcus deserti
Source: PubMed Central journal article supplement (PMC2669436; doi:10.1371/journal.pgen.1000434), 2009-03-27
Supplement: pgen.1000434.s015.pdf [file pgen.1000434.s015.pdf]

| <b>Table S10. DNA repair genes in <i>D. deserti</i>, <i>D. radiodurans</i> and <i>D. geothermalis</i></b> |                               |                                        |                                     |                                                                                     |
|-----------------------------------------------------------------------------------------------------------|-------------------------------|----------------------------------------|-------------------------------------|-------------------------------------------------------------------------------------|
| <b>A. Main DNA repair genes for Base Excision Repair (BER)<sup>a</sup></b>                                |                               |                                        |                                     |                                                                                     |
| Gene name                                                                                                 | <i>D. deserti</i>             | <i>D. radiodurans</i>                  | <i>D. geothermalis</i>              | Putative function of the predicted gene product                                     |
| <b>Monofunctional DNA glycosylases</b>                                                                    |                               |                                        |                                     |                                                                                     |
| <i>alkA</i> (282 aa)                                                                                      | <i>Deide_08050</i> (204 aa)   | <i>DR_2074</i> (190 aa)                | <i>Dgeo_1660</i> (209 aa)           | 3-methyladenine-DNA glycosylase II                                                  |
|                                                                                                           | <i>Deide_02320</i> (216 aa)   | <i>DR_2584</i> (225 aa)                | <i>Dgeo_0107</i> (216 aa)           |                                                                                     |
| <i>tag</i> (187 aa)                                                                                       | -                             | -                                      | -                                   | 3-methyladenine-DNA glycosylase I                                                   |
| <i>mutY</i> (350 aa)                                                                                      | <i>Deide_01970</i> (353aa)    | <i>DR_2285</i> (363 aa)                | <i>Dgeo_0019</i> (343 aa)           | A/8oxoG adenine glycosylase                                                         |
| <i>mug</i> (168 aa)                                                                                       | <i>Deide_17530</i> (185 aa)   | <i>DR_0715</i> (199 aa)                | <i>Dgeo_1718</i> (195 aa)           | Removes uracil, thymine or ethenocytosine opposite guanine                          |
|                                                                                                           | -                             | -                                      | <i>Dgeo_2568</i> (177 aa) (plasmid) |                                                                                     |
| <i>ung</i> or <i>udg</i> (229 aa)                                                                         | <i>Deide_00830</i> (248 aa)   | <i>DR_0689</i> (247 aa)                | <i>Dgeo_2059</i> (245 aa)           | Uracil-DNA glycosylase                                                              |
|                                                                                                           | -                             | <i>DR_1751</i> (237 aa)                | <i>Dgeo_1556</i> (230 aa)           |                                                                                     |
|                                                                                                           | -                             | <i>DR_0022</i> (199 aa) <sup>b</sup>   | -                                   |                                                                                     |
| <b>Bifunctional DNA glycosylases (displaying also a AP lyase activity)</b>                                |                               |                                        |                                     |                                                                                     |
| <i>fpg</i> ( <i>mutM</i> ) (269 aa)                                                                       | <i>Deide_16240</i> (276 aa)   | <i>DR_0493</i> (280 aa)                | <i>Dgeo_0442</i> (289 aa)           | Formamidopyrimidine-DNA glycosylase                                                 |
| <i>nth</i> (211 aa)                                                                                       | <i>Deide_01790</i> (222 aa)   | <i>DR_0289</i> ( <i>nth1</i> )(225 aa) | <i>Dgeo_0248</i> (233 aa)           | Endonuclease III; removes ring-saturated or fragmented pyrimidines                  |
|                                                                                                           | <i>Deide_23070</i> (247 aa)   | <i>DR_2438</i> ( <i>nth2</i> )(259 aa) | <i>Dgeo_2290</i> (242 aa)           |                                                                                     |
|                                                                                                           | <i>Deide_12880</i> (237 aa)   | <i>DR_0928</i> (338 aa)                | <i>Dgeo_0785</i> (269 aa)           |                                                                                     |
| <i>nei</i> (263 aa)                                                                                       | -                             | -                                      | -                                   | Endonuclease VIII, DNA N-glycosylase/AP lyase                                       |
| <b>AP endonucleases</b>                                                                                   |                               |                                        |                                     |                                                                                     |
| <i>nfi</i> (223 aa)                                                                                       | -                             | <i>DR_2162</i> (181 aa)                | -                                   | Endonuclease V                                                                      |
| <i>nfo</i> (285 aa)                                                                                       | -                             | -                                      | -                                   | Endonuclease IV                                                                     |
| <i>xthA</i> (268 aa)                                                                                      | <i>Deide_03250</i> (260 aa)   | <i>DR_0354</i> (283 aa)                | <i>Dgeo_0461</i> (267 aa)           | Exodeoxyribonuclease III                                                            |
|                                                                                                           | <i>Deide_2p01470</i> (270 aa) | -                                      | <i>Dgeo_2484</i> (254aa) (plasmid)  |                                                                                     |
| <b>B. Main DNA repair genes for Nucleotide Excision Repair (NER)<sup>a</sup></b>                          |                               |                                        |                                     |                                                                                     |
| Gene name                                                                                                 | <i>D. deserti</i>             | <i>D. radiodurans</i>                  | <i>D. geothermalis</i>              | Protein description                                                                 |
| <i>mfd</i> (1148 aa)                                                                                      | <i>Deide_06920</i> (1041 aa)  | <i>DR_1532</i> (1054 aa)               | <i>Dgeo_0545</i> (1041 aa)          | transcription-repair coupling factor; helicase                                      |
| <i>uvrA</i> (940 aa)                                                                                      | <i>Deide_12760</i> (1004 aa)  | <i>DR_1771</i> (1016 aa)               | <i>Dgeo_0694</i> (1004 aa)          | DNA damage recognition protein UvrA; DNA independent ATPase and DNA binding protein |
|                                                                                                           | <i>Deide_2p02060</i> (831 aa) | <i>DR_A0188</i> (922 aa)               | -                                   |                                                                                     |
| <i>uvrB</i> (673 aa)                                                                                      | <i>Deide_03120</i> (671 aa)   | <i>DR_2275</i> (730 aa)                | <i>Dgeo_1890</i> (676 aa)           | DNA damage binding protein UvrB ; helicase                                          |
| <i>uvrC</i> (610 aa)                                                                                      | <i>Deide_11450</i> (617 aa)   | <i>DR_1354</i> (617 aa)                | <i>Dgeo_1124</i> (616 aa)           | Excision nuclease                                                                   |
| <i>uvrD</i> (720 aa)                                                                                      | <i>Deide_12100</i> (744 aa)   | <i>DR_1775</i> (745 aa)                | <i>Dgeo_0868</i> (741 aa)           | DNA helicase II                                                                     |

|                  |                             |                          |                           |                                                                          |
|------------------|-----------------------------|--------------------------|---------------------------|--------------------------------------------------------------------------|
| BS_ywjD (320 aa) | <i>Deide_17800</i> (301 aa) | <i>DR_1819</i> (305 aa)  | <i>Dgeo_1819</i> (311 aa) | UV DNA damage endonuclease UvsE                                          |
| yejH (586 aa)    | <i>Deide_17320</i> (467 aa) | <i>DR_A0131</i> (895 aa) | -                         | DNA or RNA helicase of superfamily II (COG1061); also predicted nuclease |
| cho (295 aa)     | -                           | -                        | -                         | UvrC homolog                                                             |

### C. Main DNA repair genes for Mismatch Repair <sup>a</sup>

| Gene name            | <i>D. deserti</i>                       | <i>D. radiodurans</i>               | <i>D. geothermalis</i>                | Protein description                           |
|----------------------|-----------------------------------------|-------------------------------------|---------------------------------------|-----------------------------------------------|
| <i>mutL</i> (615 aa) | <i>Deide_15600</i> (550 aa)             | <i>DR_1696</i> (547 aa)             | <i>Dgeo_1538</i> (549 aa)             | DNA mismatch repair protein; ATPase           |
| <i>mutS</i> (853 aa) | <i>Deide_15540 (mutS1)</i> (849 aa)     | <i>DR_1039 (mutS1)</i> (850 aa)     | <i>Dgeo_1537 (mutS1)</i> (880 aa)     | DNA mismatch repair protein; ATPase           |
|                      | <i>Deide_05000 (mutS2)</i> (767 aa)     | <i>DR_1976 (mutS2)</i> (766 aa)     | <i>Dgeo_0899 (mutS2)</i> (789 aa)     | MutS2 family protein; ATPase                  |
| <i>xseA</i> (456aa)  | <i>Deide_22980</i> (402aa)              | <i>DR_0186</i> (416aa)              | <i>Dgeo_0148</i> (413aa)              | Exonuclease VII, large subunit                |
| <i>xseB</i> (80 aa)  | <i>Deide_02120</i> (87 aa) <sup>c</sup> | <i>DR_2586</i> (85 aa) <sup>c</sup> | <i>Dgeo_0027</i> (83 aa) <sup>c</sup> | Exonuclease VII, small subunit                |
| <i>dam</i> (278 aa)  | -                                       | -                                   | -                                     | Methylase GATC                                |
| <i>mutH</i> (229 aa) | -                                       | -                                   | -                                     | Endonuclease GATC                             |
| <i>dcm</i> (472 aa)  | -                                       | -                                   | -                                     | C-5 cytosine methyltransferase                |
| <i>vsr</i> (156 aa)  | -                                       | -                                   | -                                     | Very short patch repair protein; endonuclease |

### D. Main DNA repair genes for Direct Reversal of DNA damage (DR) <sup>a</sup>

| Gene name                       | <i>D. deserti</i>                      | <i>D. radiodurans</i>   | <i>D. geothermalis</i>    | Protein description                                             |
|---------------------------------|----------------------------------------|-------------------------|---------------------------|-----------------------------------------------------------------|
| <i>ada</i> (354 aa)             | -                                      | -                       | -                         | O-6-methylguanine-DNA alkyltransferase; Transcription activator |
| <i>ogt/ybaZ</i> (171 aa/129 aa) | <i>Deide_22770</i> (118 aa)            | <i>DR_0428</i> (139 aa) | <i>Dgeo_2101</i> (124 aa) | O-6-alkylguanine transferase                                    |
| <i>alkB</i> (216 aa)            | -                                      | -                       | -                         | N1-methyladenine and N3-methylcytosine repair protein           |
| <i>phrB</i> (472 aa)            | -                                      | -                       | -                         | DNA photolyase                                                  |
| <i>BS_splB</i> (342 aa)         | <a href="#">Deide_3p02150</a> (354 aa) | -                       | -                         | DNA repair photolyase                                           |
| <i>dut</i> (151 aa)             | -                                      | -                       | -                         | dUTPase                                                         |
| <i>dcd</i> (193 aa)             | <i>Deide_16640</i> (186 aa)            | -                       | <i>Dgeo_1880</i> (186 aa) | Deoxycytidine triphosphate deaminase                            |
| <i>yggV</i> (197 aa)            | <i>Deide_19360</i> (202 aa)            | <i>DR_0179</i> (200 aa) | <i>Dgeo_2209</i> (199 aa) | Xanthosine triphosphate pyrophosphatase                         |

### E. Main DNA repair genes for recombinational repair (RER) <sup>a</sup>

| Gene name             | <i>D. deserti</i>                      | <i>D. radiodurans</i>   | <i>D. geothermalis</i>    | Protein description                                                                           |
|-----------------------|----------------------------------------|-------------------------|---------------------------|-----------------------------------------------------------------------------------------------|
| <i>recA</i> (353 aa)  | <a href="#">Deide_19450</a> (355 aa)   | <i>DR_2340</i> (363 aa) | <i>Dgeo_2138</i> (358 aa) | DNA strand exchange and renaturation, DNA-dependent ATPase, DNA- and ATP-dependent coprotease |
|                       | <a href="#">Deide_1p01260</a> (344 aa) |                         |                           |                                                                                               |
|                       | <a href="#">Deide_3p00210</a> (344 aa) |                         |                           |                                                                                               |
| <i>recB</i> (1180 aa) | - <sup>d</sup>                         | -                       | -                         | DNA helicase, ATP-dependent dsDNA/ssDNA exonuclease V subunit, ss DNA endonuclease            |
| <i>recC</i> (1122 aa) | -                                      | -                       | -                         | DNA helicase, ATP-dependent dsDNA/ssDNA exonuclease V subunit, ss DNA endonuclease            |

|                                           |                                                             |                                                              |                                                                                                                                   |                                                                                   |
|-------------------------------------------|-------------------------------------------------------------|--------------------------------------------------------------|-----------------------------------------------------------------------------------------------------------------------------------|-----------------------------------------------------------------------------------|
| <i>recD</i> (608 aa)                      | <i>Deide_16210</i> (710 aa)                                 | <i>DR_1902</i> (715 aa)                                      | <i>Dgeo_0826</i> (726 aa)                                                                                                         | DNA helicase, ATP-dependent dsDNA/ssDNA exonuclease V subunit, ssDNA endonuclease |
| <i>recE</i> (866 aa)                      | -                                                           | -                                                            | -                                                                                                                                 | Exonuclease VIII, dsDNA exonuclease, 5'=>3' specific                              |
| <i>recF</i> (357 aa)                      | <i>Deide_14250</i> (363 aa)                                 | <i>DR_1089</i> (359 aa)                                      | <i>Dgeo_1620</i> (358 aa)                                                                                                         | Recombinational repair protein                                                    |
| <i>recG</i> (693 aa)                      | <i>Deide_09960</i> (780 aa)                                 | <i>DR_1916</i> (784 aa)                                      | <i>Dgeo_1139</i> (776 aa)                                                                                                         | Holliday junction-specific DNA helicase; branch migration inducer                 |
| <i>recJ</i> (577 aa)                      | <i>Deide_07130</i> (714 aa)                                 | <i>DR_1126</i> (684 aa)                                      | <i>Dgeo_1599</i> (702 aa)                                                                                                         | ssDNA exonuclease, 5'=>3' specific                                                |
| <i>recN</i> (553 aa)                      | <i>Deide_12310</i> (534 aa)                                 | <i>DR_1477</i> (564 aa)                                      | <i>Dgeo_1194</i> (555 aa)                                                                                                         | Recombination and repair protein                                                  |
| <i>recO</i> (242 aa)                      | <i>Deide_13810</i> (247 aa)                                 | <i>DR_0819</i> (244 aa)                                      | <i>Dgeo_0855</i> (243 aa)                                                                                                         | Bacterial recombinational repair protein                                          |
| <i>recQ</i> (609 aa)<br>(one HRDC domain) | <i>Deide_11320</i> (731 aa)<br>(two HRDC domains)           | <i>DR_1289</i> (824 aa) <sup>c</sup><br>(three HRDC domains) | <i>Dgeo_1226</i> (195 aa !)<br>frameshift? (one HRDC domain)<br>(no RQC domain)                                                   | ATP-dependent DNA helicase RecQ                                                   |
|                                           | <i>Deide_02180</i> (591 aa)<br>(one HRDC domain)            | <i>DR_2444</i> (603 aa) <sup>c</sup><br>(one HRDC domain)    | <i>Dgeo_0021</i> (653 aa)<br>(one HRDC domain)                                                                                    | Nucleic acid-binding protein, HRDC family                                         |
|                                           | <i>Deide_1p01280</i> (548 aa)<br>(no RQC and HRDC domains)  | -                                                            | -                                                                                                                                 | ATP-dependent DNA helicase, RecQ family; partial COG0514                          |
|                                           | <i>Deide_06510_3</i> (1683 aa)<br>(no RQC and HRDC domains) | -                                                            | -                                                                                                                                 | Multidomain protein: 1 is DnaQ, 2 is DinG, 3 is RecQ <sup>f</sup>                 |
| <i>recR</i> (201 aa)                      | <i>Deide_06340</i> (198 aa)                                 | <i>DR_0198</i> (220 aa)                                      | <i>Dgeo_1513</i> (222 aa)                                                                                                         | Recombination and repair protein                                                  |
| <i>recT</i> (269 aa)                      | -                                                           | -                                                            | -                                                                                                                                 | Recombinase, DNA renaturation                                                     |
| <i>recX</i> (166 aa)                      | <i>Deide_12350</i> (195 aa)                                 | <i>DR_1310</i> (204 aa)                                      | <i>Dgeo_1433</i> (191 aa)                                                                                                         | Regulatory protein                                                                |
| <i>radA</i> (sms) (460 aa)                | <i>Deide_12660</i> (449 aa)                                 | <i>DR_1105</i> (503 aa)                                      | <i>Dgeo_1212</i> (449 aa)                                                                                                         | DNA repair protein RadA                                                           |
| <i>rusA</i> ( <i>ybcP</i> ) (120 aa)      | -                                                           | -                                                            | -                                                                                                                                 | Endonuclease/Holliday junction resolvase                                          |
| <i>ruvA</i> (203 aa)                      | <i>Deide_09360</i> (202 aa)                                 | <i>DR_1274</i> (201 aa)                                      | <i>Dgeo_0726</i> (198 aa)                                                                                                         | Holliday junction helicase subunit A; branch migration                            |
| <i>ruvB</i> (336 aa)                      | <i>Deide_18350</i> (334 aa)                                 | <i>DR_0596</i> (333 aa)                                      | <i>Dgeo_0404</i> (331 aa)                                                                                                         | Holliday junction helicase subunit B; branch migration                            |
| <i>ruvC</i> (173 aa)                      | <i>Deide_20630</i> (169 aa)                                 | <i>DR_0440</i> (179 aa)                                      | <i>Dgeo_0327</i> (168 aa)                                                                                                         | Holliday junction endonuclease                                                    |
| <i>ygqF</i> (138 aa)                      | <i>Deide_04280</i> (139 aa)                                 | <i>DR_2509</i> (136 aa)                                      | <i>Dgeo_0425</i> (232 aa)                                                                                                         | Putative Holliday junction resolvase                                              |
| <i>sbcB</i> (475 aa)                      | -                                                           | -                                                            | -                                                                                                                                 | exodeoxyribonuclease I                                                            |
| <i>sbcC</i> (1048 aa)                     | <i>Deide_16170</i> (911 aa)                                 | <i>DR_1922</i> (909 aa)                                      | <i>Dgeo_0823</i> (910 aa)                                                                                                         | ATP dependent dsDNA exonuclease                                                   |
| <i>sbcD</i> (400 aa)                      | <i>Deide_16180</i> (393 aa)                                 | <i>DR_1921</i> (416 aa)                                      | <i>Dgeo_0824</i> (395 aa)                                                                                                         | ATP dependent dsDNA exonuclease                                                   |
| <i>ssb</i> (178 aa)                       | <i>Deide_00120</i> (297 aa)                                 | <i>DR_0099</i> (301 aa)                                      | <i>Dgeo_0165</i> (301 aa)<br>(+ <i>Dgeo_2964</i> (283 aa),<br><i>Dgeo_2969</i> (352 aa),<br><i>Dgeo_3087</i> (200 aa) on plasmid) | Single-stranded DNA-binding protein                                               |

### F. Other DNA repair related genes <sup>a</sup>

| Gene name | <i>D. deserti</i> | <i>D. radiodurans</i> | <i>D. geothermalis</i> | Protein description |
|-----------|-------------------|-----------------------|------------------------|---------------------|
|-----------|-------------------|-----------------------|------------------------|---------------------|

|                                        |                                                                                                                                                                                      |                                                                      |                                                                     |                                                                                                                                 |
|----------------------------------------|--------------------------------------------------------------------------------------------------------------------------------------------------------------------------------------|----------------------------------------------------------------------|---------------------------------------------------------------------|---------------------------------------------------------------------------------------------------------------------------------|
| <i>mutT</i> and other Nudix hydrolases | 18 proteins containing Nudix box                                                                                                                                                     | 23 proteins containing Nudix box <sup>g</sup>                        | 14 proteins containing Nudix box                                    | Nudix hydrolases                                                                                                                |
| <i>dnlJ</i> (671 aa)                   | <a href="#">Deide_12290</a> (686 aa) <sup>h</sup><br><a href="#">Deide_1p00290</a> (686 aa) <sup>h</sup>                                                                             | <i>DR_2069</i> (700 aa)                                              | <i>Dgeo_0696</i> (684 aa)                                           | DNA ligase, NAD-dependent                                                                                                       |
| <i>gyrA</i> (875 aa)                   | <i>Deide_12520</i> (811 aa)                                                                                                                                                          | <i>DR_1913</i> (812 aa)                                              | <i>Dgeo_1016</i> (809 aa)                                           | DNA gyrase subunit A                                                                                                            |
| <i>gyrB</i> (804 aa)                   | <i>Deide_15490</i> (674 aa)                                                                                                                                                          | <i>DR_0906</i> (663 aa)                                              | <i>Dgeo_0546</i> (711 aa)                                           | DNA gyrase subunit B                                                                                                            |
| <i>topA</i> (865 aa)                   | <i>Deide_07410</i> (966 aa)                                                                                                                                                          | <i>DR_1374</i> (1021 aa)                                             | <i>Dgeo_2001</i> (964 aa)                                           | DNA topoisomerase I (Topo IA)                                                                                                   |
| -                                      | <i>Deide_00840</i> (344 aa)                                                                                                                                                          | <i>DR_0690</i> (346 aa)                                              | <i>Dgeo_2058</i> (349 aa)                                           | DNA topoisomerase IB                                                                                                            |
| <i>radC</i> (222 aa)                   | -                                                                                                                                                                                    | -                                                                    | -                                                                   | DNA repair protein                                                                                                              |
| <i>xni</i> (281 aa)                    | <a href="#">Deide_1p00132</a> (244 aa)                                                                                                                                               | -                                                                    | -                                                                   | 5'-3' exonuclease; exonuclease IX                                                                                               |
| -                                      | -                                                                                                                                                                                    | <i>DR_1757</i> (328 aa)                                              | -                                                                   | nuclease-related domain (NERD) protein                                                                                          |
| <i>lexA</i> (202 aa)                   | <i>Deide_1p01870</i> (211 aa)<br><i>Deide_01180</i> (240 aa)                                                                                                                         | <i>DR_A0344 (lexA1)</i> (210 aa)<br><i>DR_A0074 (lexA2)</i> (248 aa) | <i>Dgeo_1366</i> (236 aa)                                           | Transcriptional regulator, repressor of the SOS regulon, autoprotease                                                           |
| <i>polA</i> (928 aa)                   | <i>Deide_15130</i> (926 aa)                                                                                                                                                          | <i>DR_1707</i> (956 aa)                                              | <i>Dgeo_1666</i> (907 aa)                                           | DNA polymerase I                                                                                                                |
| <i>polB</i> (783 aa)                   | <a href="#">Deide_1p00180</a> (765 aa)                                                                                                                                               | -                                                                    | -                                                                   | DNA polymerase II                                                                                                               |
| <i>dnaE</i> (1160 aa)                  | <i>Deide_21950</i> (1341 aa)<br><a href="#">Deide_1p01900</a> (1058 aa)                                                                                                              | <i>DR_0507</i> (1335 aa)                                             | <i>Dgeo_0255</i> (1322 aa)                                          | DNA polymerase III alpha subunit<br>Putative error-prone DNA polymerase DnaE2                                                   |
| <i>dnaQ</i> (243 aa)                   | <i>Deide_17790</i> (202 aa)<br><a href="#">Deide_05970</a> (204 aa)<br><a href="#">Deide_06510_1</a> (1683 aa)<br>multidomain protein <sup>f</sup> : 1 is DnaQ, 2 is DinG, 3 is RecQ | <i>DR_0856</i> (197 aa)                                              | <i>Dgeo_1818</i> (180 aa)                                           | DNA polymerase III epsilon subunit (3'-5' exonuclease subunit)                                                                  |
| <i>holE</i> (76 aa)                    | -                                                                                                                                                                                    | -                                                                    | -                                                                   | DNA polymerase III theta subunit                                                                                                |
| <i>dnaN</i> (366 aa)                   | <i>Deide_00020</i> (360 aa)                                                                                                                                                          | <i>DR_0001</i> (393 aa)                                              | <i>Dgeo_0003</i> (360 aa)<br><i>Dgeo_3063</i> (367 aa)<br>(plasmid) | DNA polymerase III beta subunit                                                                                                 |
| <i>dnaX</i> (643 aa)                   | <i>Deide_01610</i> (762 aa)                                                                                                                                                          | <i>DR_2410</i> (615 aa)                                              | <i>Dgeo_2135</i> (737 aa)                                           | DNA polymerase III tau/gamma subunit                                                                                            |
| <i>holA</i> (343 aa)                   | <i>Deide_10170</i> (300 aa)                                                                                                                                                          | <i>DR_1244</i> (300 aa)                                              | <i>Dgeo_0745</i> (312 aa)                                           | DNA polymerase III delta subunit                                                                                                |
| <i>holB</i> (334 aa)                   | <i>Deide_21710</i> (318 aa)                                                                                                                                                          | <i>DR_2332</i> (321 aa)                                              | <i>Dgeo_2262</i> (316 aa)                                           | DNA polymerase III delta prime subunit                                                                                          |
| <i>holC</i> (147 aa)                   | -                                                                                                                                                                                    | -                                                                    | -                                                                   | DNA polymerase III chi subunit                                                                                                  |
| <i>holD</i> (137 aa)                   | -                                                                                                                                                                                    | -                                                                    | -                                                                   | DNA polymerase III psi subunit                                                                                                  |
| BS <i>yshC</i> (570 aa)                | <i>Deide_07030</i> (568 aa)                                                                                                                                                          | <i>DR_0467</i> (572 aa)                                              | <i>Dgeo_1609</i> (572 aa)                                           | DNA polymerase, family X                                                                                                        |
| <i>umuC</i> (422 aa)                   | -                                                                                                                                                                                    | -                                                                    | -                                                                   | DNA polymerase type-Y family; error-prone DNA polymerase; in conjunction with UmuD and RecA catalyses translesion DNA synthesis |
| <i>umuD</i> (139 aa)                   | -                                                                                                                                                                                    | -                                                                    | -                                                                   | In conjunction with UmuC and RecA facilitates translesion DNA synthesis; autoprotease                                           |
| <i>dinB</i> ( <i>dinP</i> ) (351 aa)   | -                                                                                                                                                                                    | -                                                                    | -                                                                   | Pol IV, DNA polymerase type-Y family, contains 1 UmuC domain                                                                    |

|                                                                                                                                           |                                                                                                               |                                                                                  |                                                                                           |                                                                       |
|-------------------------------------------------------------------------------------------------------------------------------------------|---------------------------------------------------------------------------------------------------------------|----------------------------------------------------------------------------------|-------------------------------------------------------------------------------------------|-----------------------------------------------------------------------|
| -                                                                                                                                         | <a href="#">Deide_1p01880</a> (423 aa)                                                                        | -                                                                                | -                                                                                         | Related to putative Y-family DNA polymerase                           |
| <i>dinG</i> (716 aa)                                                                                                                      | <a href="#">Deide_06510_2</a> (1683 aa)<br>multidomain protein <sup>f</sup> : 1 is DnaQ, 2 is DinG, 3 is RecQ | -                                                                                | -                                                                                         | Predicted helicase; SOS inducer in <i>E. coli</i>                     |
| -                                                                                                                                         | <a href="#">Deide_06520</a> (849 aa)                                                                          | -                                                                                | -                                                                                         | UvrD/REP helicase; COG0210, UvrD, Superfamily I DNA and RNA helicases |
| BS_ywqA (922 aa)                                                                                                                          | <a href="#">Deide_08980</a> (1132 aa)                                                                         | <i>DR_1259</i> (600 aa) +<br><i>DR_1258</i> (916 aa)<br>(2 genes or frameshift?) | <i>Dgeo_1491</i> (1126 aa)                                                                | DNA helicase SNF2/Rad54 family                                        |
| -                                                                                                                                         | <a href="#">Deide_17480</a> (689 aa)                                                                          | <i>DR_1572</i> (frameshift)                                                      | -                                                                                         | Superfamily I DNA and RNA helicases (COG3973)                         |
| <i>dnaA</i> (467 aa)                                                                                                                      | <a href="#">Deide_00010</a> (459 aa)                                                                          | <i>DR_0002</i> (466 aa)                                                          | <i>Dgeo_0001</i> (470 aa)                                                                 | Chromosomal replication initiator protein                             |
| <i>dnaB</i> (471 aa)                                                                                                                      | <a href="#">Deide_04710</a> (448 aa)                                                                          | <i>DR_0549</i> (448 aa)                                                          | <i>Dgeo_2037</i> (849 aa;<br>intein-mediated protein splicing)                            | Replicative DNA helicase                                              |
| <i>dnaC</i> (245 aa)                                                                                                                      | -                                                                                                             | -                                                                                | -                                                                                         | DNA replication protein                                               |
| <i>dnaG</i> (581 aa)                                                                                                                      | <a href="#">Deide_04900</a> (572 aa)                                                                          | <i>DR_0601</i> (571 aa)                                                          | <i>Dgeo_1910</i> (587 aa)                                                                 | DNA primase                                                           |
| <i>dnaT</i> (179 aa)                                                                                                                      | -                                                                                                             | -                                                                                | -                                                                                         | Primosomal protein 1                                                  |
| <i>priA</i> (732 aa)                                                                                                                      | <a href="#">Deide_00480</a> (857 aa)                                                                          | <i>DR_2606</i> (925 aa)                                                          | <i>Dgeo_0271</i> (841 aa)                                                                 | Primosomal protein N <sup>o</sup>                                     |
| <i>priB</i> (104 aa)                                                                                                                      | -                                                                                                             | -                                                                                | -                                                                                         | Primosomal replication protein n                                      |
| <i>priC</i> (175 aa)                                                                                                                      | -                                                                                                             | -                                                                                | -                                                                                         | Primosomal replication protein N <sup>o</sup>                         |
| <i>rarA</i> ( <i>mgsA</i> , <i>ycaJ</i> ) (447 aa)                                                                                        | <a href="#">Deide_04980</a> (451 aa)                                                                          | <i>DR_1898</i> (434 aa)                                                          | <i>Dgeo_1401</i> (451 aa)                                                                 | Replication-associated recombination protein                          |
| <b>G. Other radiation tolerance-associated genes in <i>D. deserti</i>, <i>D. radiodurans</i> and <i>D. geothermalis</i><sup>a,i</sup></b> |                                                                                                               |                                                                                  |                                                                                           |                                                                       |
| <i>D. deserti</i>                                                                                                                         | <i>D. radiodurans</i>                                                                                         | <i>D. geothermalis</i>                                                           | Protein description                                                                       |                                                                       |
| <a href="#">Deide_03030</a> (281 aa)                                                                                                      | <i>DR_0167</i> (328 aa)                                                                                       | <i>Dgeo_0395</i> (289 aa)                                                        | IrrE, regulator of <i>recA</i> expression in <i>D. radiodurans</i>                        |                                                                       |
| <a href="#">Deide_2p01380</a> (294 aa)                                                                                                    | <i>DR_A0346</i> (300 aa)                                                                                      | <i>Dgeo_2628</i> (302 aa)<br>(plasmid)                                           | DNA damage repair protein PprA                                                            |                                                                       |
| <a href="#">Deide_09150</a> (201 aa)                                                                                                      | <i>DR_0423</i> (208 aa)                                                                                       | <i>Dgeo_0977</i> (201 aa)                                                        | DNA damage response protein DdrA; Rad52/22 double-strand break repair protein             |                                                                       |
| <a href="#">Deide_02990</a> (178 aa)                                                                                                      | <i>DR_0070</i> (199 aa)                                                                                       | <i>Dgeo_0295</i> (178 aa)                                                        | DdrB                                                                                      |                                                                       |
| <a href="#">Deide_23280</a> (232 aa)                                                                                                      | <i>DR_0003</i> reversed (231 aa)                                                                              | <i>Dgeo_0047</i> reversed (229 aa)                                               | DdrC ( <i>DR_0003</i> and <i>Dgeo_0047</i> probably incorrectly annotated, see main text) |                                                                       |
| <a href="#">Deide_01160</a> (158 aa)                                                                                                      | <i>DR_0326</i> (198 aa)                                                                                       | <i>Dgeo_2186</i> (160 aa)                                                        | DdrD                                                                                      |                                                                       |
| <a href="#">Deide_11220</a> (228 aa)                                                                                                      | <i>DR_0194</i> (227 aa)                                                                                       | <i>Dgeo_1282</i> (226 aa)                                                        | DdrE; Related to zinc metallopeptidase                                                    |                                                                       |
| -                                                                                                                                         | <i>DR_0219</i> (444 aa)                                                                                       | -                                                                                | DdrF                                                                                      |                                                                       |
| -                                                                                                                                         | <i>DR_0227</i> (242 aa)                                                                                       | -                                                                                | DdrG                                                                                      |                                                                       |
| <a href="#">Deide_20641</a> (82 aa)                                                                                                       | <i>DR_0438</i> reversed (92 aa)                                                                               | <i>Dgeo_0322</i> (82 aa)                                                         | DdrH ( <i>DR_0438</i> probably incorrectly annotated, see main text)                      |                                                                       |
| <a href="#">Deide_12530</a> (205 aa)                                                                                                      | <i>DR_0997</i> (260 aa)                                                                                       | <i>Dgeo_1015</i> (204 aa)                                                        | DdrI; Transcriptional regulator, Crp/Fnr family                                           |                                                                       |

|                                                                                                      |                          |                          |                                                                                               |
|------------------------------------------------------------------------------------------------------|--------------------------|--------------------------|-----------------------------------------------------------------------------------------------|
| -                                                                                                    | <i>DR_1263</i> (222 aa)  | -                        | DdrJ                                                                                          |
| -                                                                                                    | <i>DR_1264</i> (140 aa)  | -                        | DdrK                                                                                          |
| -                                                                                                    | <i>DR_1439</i> (175 aa)  | -                        | DdrL                                                                                          |
| <i>Deide_02930</i> (180 aa)                                                                          | <i>DR_2441</i> (170aa)   | <i>Dgeo_0078</i> (168aa) | DdrN                                                                                          |
| <b><i>Deide_20570</i></b> (129 aa) <sup>j</sup><br><b><i>Deide_3p02170</i></b> (129 aa) <sup>j</sup> | <i>DR_2574</i> (131aa)   | <i>Dgeo_0336</i> (140aa) | DdrO; transcriptional regulator, XRE family                                                   |
| -                                                                                                    | <i>DR_B0100</i> (210 aa) | -                        | DdrP                                                                                          |
| -                                                                                                    | <i>DR_B0141</i> (168 aa) | -                        | HicB-related protein                                                                          |
| -                                                                                                    | <i>DR_1262</i> (531 aa)  | -                        | ribonucleoprotein Ro/SS-A-related protein; involved in UV resistance in <i>D. radiodurans</i> |
| -                                                                                                    | <i>DR_0171</i> (230 aa)  | -                        | IrrI                                                                                          |

<sup>a</sup> The gene names are from *E. coli* whenever an *E. coli* ortholog exists, or from *B. subtilis* (with the prefix BS\_). The sizes of the predicted gene products (in number of amino acid residues) are indicated. *D. deserti* genes in **blue and bold face** indicate supplementary genes when compared to *D. radiodurans* and *D. geothermalis*. Grey indicates gene products identified in proteome analysis after standard cultivation of *D. deserti*.

<sup>b</sup> DR\_0022 did not demonstrate any appreciable uracil-DNA glycosylase activity in a study by Sandigursky et al (1)

<sup>c</sup> DR\_2586 contains domain COG1722; this domain is not found in the DR\_2586 homologs *Deide\_02120* and *Dgeo\_0027*

<sup>d</sup> *D. deserti* plasmid P2 contains a “pseudogene” (*Deide\_2p00840-Deide\_2p00850-Deide\_2p00860*, interrupted by 2 stop codons), whose putative product has 27% identity with BS\_AddA, and which is probably in operon with *Deide\_2p00830* encoding a protein with 25% identity with BS\_AddB

<sup>e</sup> In *D. radiodurans*, DR\_1289 is required for resistance to DNA damaging agents, whereas DR\_2444, which does not contain helicase and RQC domains, is not (2). All three HRDC domains are involved in DR\_1289 RecQ function (3, 4)

<sup>f</sup> A homolog of this multidomain protein *Deide\_06510* is found in *Thermus thermophilus* HB27: TT\_P0128 (1649 aa)

<sup>g</sup> Most, if not all, of the *D. radiodurans* Nudix hydrolases are probably not functional homologs of MutT (5)

<sup>h</sup> *Deide\_12290* and *Deide\_1p00290* have 57% identity

<sup>i</sup> DdrA, DdrE, DdrI and DdrN homologs with more than 40% identity are present in *T. thermophilus*. Other common genes/proteins are specific to *Deinococcus*.

<sup>j</sup> *Deide\_20570* and *Deide\_3p02170* have 84% identity

1. Sandigursky M, Sandigursky S, Sonati P, Daly MJ, Franklin WA (2004) Multiple uracil-DNA glycosylase activities in *Deinococcus radiodurans*. DNA Repair (Amst) 3: 163-169.
2. Huang LF, Zhang SW, Hua XT, Gao GJ, Hua YJ (2006) Construction of the recQ double mutants and analysis of adversity in *Deinococcus radiodurans*. Wei Sheng Wu Xue Bao 46: 205-209.
3. Killoran MP, Keck JL (2006) Three HRDC domains differentially modulate *Deinococcus radiodurans* RecQ DNA helicase biochemical activity. J Biol Chem 281: 12849-12857.
4. Huang L, Hua X, Lu H, Gao G, Tian B, et al. (2007) Three tandem HRDC domains have synergistic effect on the RecQ functions in *Deinococcus radiodurans*. DNA Repair (Amst) 6: 167-176.
5. Xu W, Shen J, Dunn CA, Desai S, Bessman MJ (2001) The Nudix hydrolases of *Deinococcus radiodurans*. Mol Microbiol 39: 286-290.
