# Supplementary material for: Alliance of Proteomics and Genomics to Unravel the Specificities of Sahara Bacterium Deinococcus deserti
Source: PubMed Central journal article supplement (PMC2669436; doi:10.1371/journal.pgen.1000434), 2009-03-27
Supplement: pgen.1000434.s016.pdf [file pgen.1000434.s016.pdf]

| <b>Table S11. Radiation/desiccation response motif identified in <i>D. deserti</i></b>                                                                |                 |                    |                          |
|-------------------------------------------------------------------------------------------------------------------------------------------------------|-----------------|--------------------|--------------------------|
| <b>gene<sup>a</sup></b>                                                                                                                               | <b>position</b> | <b>site</b>        | <b>score<sup>b</sup></b> |
| <i>Deide_23280</i> (correct <i>ddrC</i> )                                                                                                             | -37             | TTATGTTTTTTAGCATAA | 15.00                    |
| <i>Deide_02990</i> ( <i>ddrB</i> )                                                                                                                    | -30             | TTATGTTATTTACATAA  | 14.86                    |
| <i>Deide_01160</i> ( <i>ddrD</i> )                                                                                                                    | -27             | TTCTGCTTTAAACATAA  | 14.56                    |
| <i>Deide_15490</i> ( <i>gyrB</i> )                                                                                                                    | -145            | TTACGTTATATACGTAA  | 14.21                    |
| <i>Deide_18730</i> (operon, conserved genes: <i>Deide_18730</i> , <i>Deide_18720</i> , <i>Deide_18710</i> , <i>Deide_18700</i> , <i>Deide_18690</i> ) | -43             | TTACGTTCAAAGCGTAA  | 14.20                    |
| <i>Deide_12520</i> ( <i>gyrA</i> )                                                                                                                    | -119            | TTACGCCCATAACATAA  | 14.11                    |
| <i>Deide_3p00210</i> ( <i>recA-P3</i> )                                                                                                               | -64             | TTATGCTGGAATCATAA  | 14.11                    |
| <i>Deide_1p01260</i> ( <i>recA-P1</i> )                                                                                                               | -64             | TTATGCTGCAATCATAA  | 14.06                    |
| <i>Deide_19430</i> ( <i>cinA</i> ; operon with <i>ligT</i> + <i>recA</i> )                                                                            | -2              | TTATGCTTCTAGCAGAA  | 13.98                    |
| <i>Deide_11320</i> ( <i>recQ</i> )                                                                                                                    | -35             | TTACGCTAATGACATAA  | 13.96                    |
| <i>Deide_2p01380</i> ( <i>pprA</i> )                                                                                                                  | -91             | TTCTGTTTTATACAGAA  | 13.94                    |
| <i>Deide_12100</i> ( <i>uvrD</i> )                                                                                                                    | -39             | TTACGCTTTCAACAGAA  | 13.84                    |
| <i>Deide_09150</i> ( <i>ddrA</i> )                                                                                                                    | -42             | TTACGCCTTGACCAGAA  | 13.40                    |
|                                                                                                                                                       | -20             | TTCTGTTATAAACTAAA  | 13.79                    |
| <i>Deide_00600</i> (transketolase)                                                                                                                    | -191            | TTCTGTTCTCACC GGAA | 13.79                    |
| <i>Deide_12760</i> ( <i>uvrA</i> )                                                                                                                    | -67             | TTACGCACGCAACGTAA  | 13.74                    |
| <i>Deide_16210</i> ( <i>recD</i> )                                                                                                                    | -45             | TTCTGCCACAAACAGAA  | 13.65                    |
| <i>Deide_16610</i> (membrane protein)                                                                                                                 | +15             | TTCTGTCAGAAGCGGAA  | 13.57                    |
| <i>Deide_03120</i> ( <i>uvrB</i> )                                                                                                                    | -92             | TTACGTCAGGGGCGTAA  | 13.53                    |
| <i>Deide_00120</i> ( <i>ssb</i> )                                                                                                                     | -132            | TTACGGCATTGACGTAA  | 13.52                    |
| <i>Deide_04721</i> (conserved protein)                                                                                                                | -18             | TTCTGCTAGTATCAGAA  | 13.52                    |
| <i>Deide_08700</i> (conserved protein)                                                                                                                | -395            | TTACGGCGGGATCATAA  | 13.34                    |
|                                                                                                                                                       | -159            | TTATGATGAGTTCATAA  | 12.91                    |
| <i>Deide_20312</i> (glycosyl transferase)                                                                                                             | -66             | TTTTGTTGCCATCGGAA  | 13.31                    |
| <i>Deide_07131</i> (membrane protein; operon with <i>recJ</i> )                                                                                       | -32             | TTTTGCTCTGCACGAAA  | 12.96                    |
| <i>Deide_22810</i> ( <i>Deinococcus</i> -specific)                                                                                                    | -67             | TTTCGCTTACAACGAAA  | 12.86                    |
| <i>Deide_20570</i> ( <i>ddrO</i> )                                                                                                                    | -173            | TTCTGTATTGACCGTAC  | 12.84                    |

<sup>a</sup> Grey indicates gene products identified in proteome analysis after standard cultivation.

<sup>b</sup> The motifs were identified using Virtual Footprint (1). First, a position weight matrix was created using the palindromic sequences near genes from *D. radiodurans* and *D. geothermalis*, listed in Makarova et al (2), to search for matches near homologous genes in *D. deserti*. Then the identified sequences were added to those from *D. radiodurans* and *D. geothermalis* to create a new position weight matrix and to scan the entire *D. deserti* genome.

1. Münch R, Hiller K, Grote A, Scheer M, Klein J, et al. (2005) Virtual Footprint and PRODORIC: an integrative framework for regulon prediction in prokaryotes. *Bioinformatics* 21: 4187-4189.

2. Makarova KS, Omelchenko MV, Gaidamakova EK, Matrosova VY, Vasilenko A, et al. (2007) *Deinococcus geothermalis*: the pool of extreme radiation resistance genes shrinks. *PLoS ONE* 2: e955.
