# Supplementary material for: Alliance of Proteomics and Genomics to Unravel the Specificities of Sahara Bacterium Deinococcus deserti
Source: PLOS journal article supplement (doi:10.1371/journal.pgen.1000434), 2009-03-26

Figure S5

A

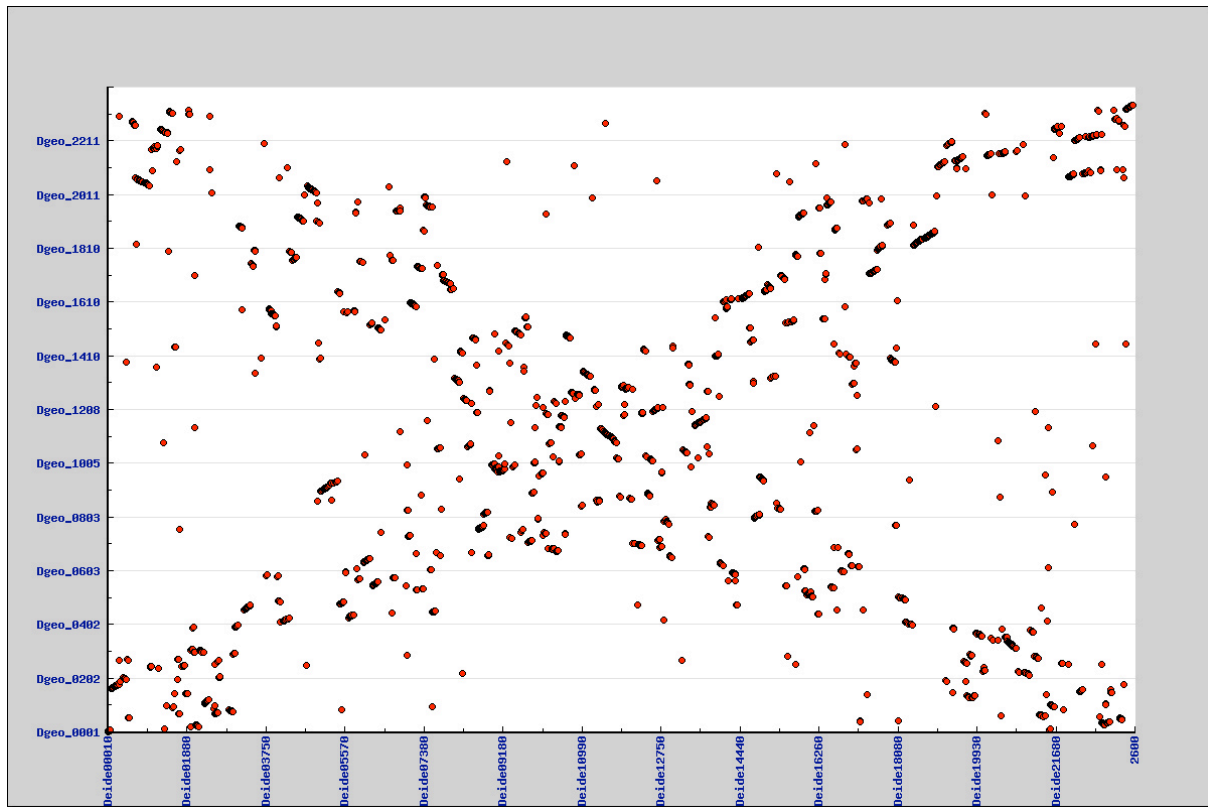

B

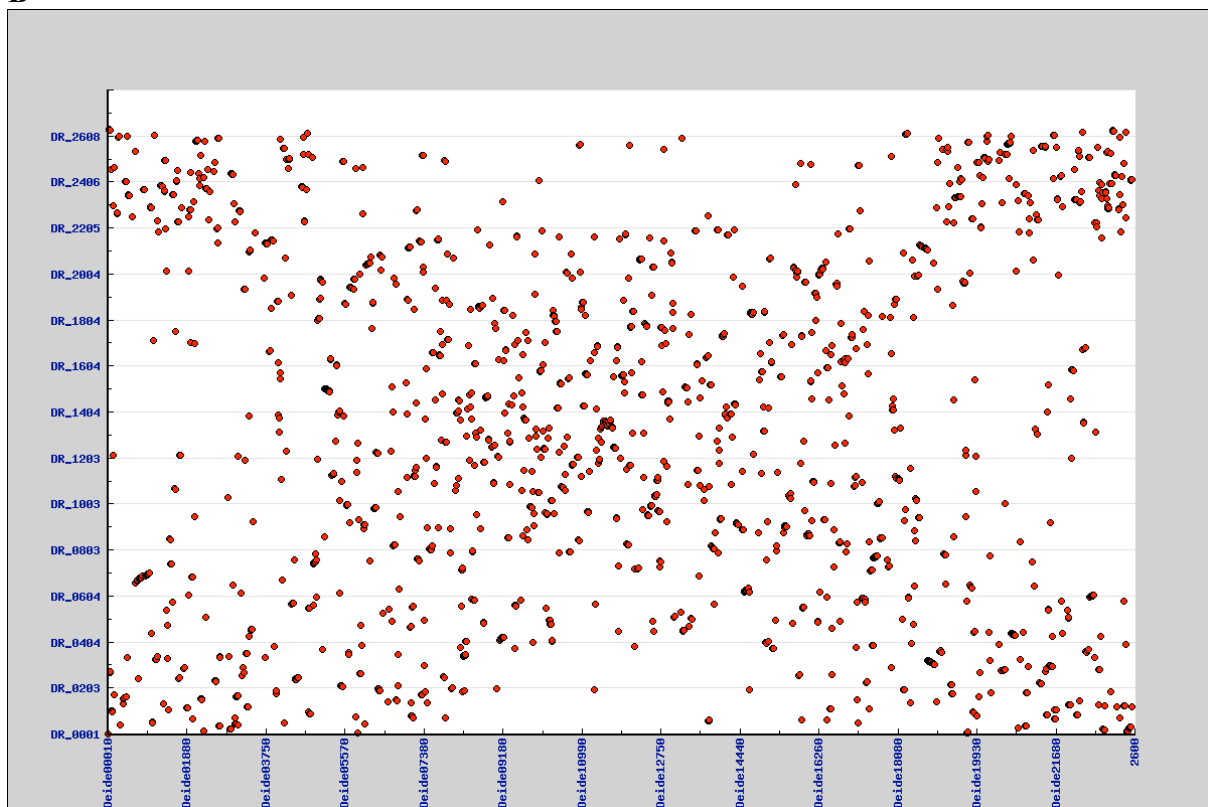

Supplement: S5 (10.1371/journal.pgen.1000434.s005) [file journal.pgen.1000434.s005]
