# Supplementary material for: Alliance of Proteomics and Genomics to Unravel the Specificities of Sahara Bacterium Deinococcus deserti
Source: PLoS Genet. 2009 Mar 27;5(3):e1000434. doi: 10.1371/journal.pgen.1000434 (PMC2669436; doi:10.1371/journal.pgen.1000434)
Supplement: Table S1 — Insertion sequences identified in the genome of D. deserti and comparison with other Deinococcus/Thermus species. (0.09 MB PDF) [file pgen.1000434.s006.pdf]

| Table S1. Insertion sequences identified in the genome of <i>D. deserti</i> and comparison with other <i>Deinococcus/Thermus</i> species |                       |            |          |           |          |           |          |           |          |              |           |
|------------------------------------------------------------------------------------------------------------------------------------------|-----------------------|------------|----------|-----------|----------|-----------|----------|-----------|----------|--------------|-----------|
| A. IS elements identified in the genome of <i>D. deserti</i>                                                                             |                       |            |          |           |          |           |          |           |          |              |           |
| name                                                                                                                                     | family<br>(subgroup)  | chromosome |          | plasmid 1 |          | plasmid 2 |          | plasmid 3 |          | total genome |           |
|                                                                                                                                          |                       | complete   | partial  | complete  | partial  | complete  | partial  | complete  | partial  | complete     | partial   |
| ISDds1                                                                                                                                   | IS3 (IS3)             | 2          |          | 1         |          | 2         |          |           |          | 5            |           |
| ISDds2                                                                                                                                   | IS4 (IS10)            | 1          |          |           | 1        |           |          |           |          | 1            | 1         |
| ISDds3                                                                                                                                   | IS4 (IS10)            |            |          | 1         | 2        |           |          |           | 1        | 1            | 3         |
| ISDds4                                                                                                                                   | IS982                 |            |          |           | 1        |           |          | 1         |          | 1            | 1         |
| ISDds5                                                                                                                                   | IS982                 |            |          |           |          |           |          | 1         |          | 1            |           |
| ISDds6                                                                                                                                   | IS701                 |            |          |           |          |           |          | 1         |          | 1            |           |
| ISDds7                                                                                                                                   | IS4 (IS10)            | 1          | 1        |           |          |           |          |           |          | 1            | 1         |
| ISDds8                                                                                                                                   | IS630                 | 1          |          |           |          |           |          |           |          | 1            |           |
| ISDds9                                                                                                                                   | IS5 (IS427)           |            |          | 1         |          |           |          |           |          | 1            |           |
| -                                                                                                                                        | IS5 (IS1031)          |            | 1        |           | 4        |           | 1        |           | 1        |              | 7         |
| -                                                                                                                                        | IS5 (IS427)           |            |          |           |          |           | 1        |           |          |              | 1         |
| -                                                                                                                                        | IS5 (ISL2)            |            | 1        |           |          |           |          |           |          |              | 1         |
| -                                                                                                                                        | IS6                   |            |          |           |          |           |          |           | 1        |              | 1         |
| -                                                                                                                                        | IS30                  |            | 1        |           |          |           |          |           |          |              | 1         |
| -                                                                                                                                        | IS200/IS605<br>(ORFB) |            |          |           |          |           |          |           | 1        |              | 1         |
| -                                                                                                                                        | IS630                 |            |          |           |          |           |          |           | 3        |              | 3         |
| -                                                                                                                                        | IS701                 |            |          |           | 1        |           |          |           |          |              | 1         |
| -                                                                                                                                        | IS982                 |            | 1        |           |          |           | 1        |           | 1        |              | 3         |
| <b>total</b>                                                                                                                             |                       | <b>5</b>   | <b>5</b> | <b>3</b>  | <b>9</b> | <b>2</b>  | <b>3</b> | <b>3</b>  | <b>8</b> | <b>13</b>    | <b>25</b> |

| <b>B. Comparison of IS family copy number and composition in three deinococci and <i>T. thermophilus</i></b> |                   |           |                       |           |                        |           |                             |           |                            |           |
|--------------------------------------------------------------------------------------------------------------|-------------------|-----------|-----------------------|-----------|------------------------|-----------|-----------------------------|-----------|----------------------------|-----------|
|                                                                                                              | <i>D. deserti</i> |           | <i>D. radiodurans</i> |           | <i>D. geothermalis</i> |           | <i>T. thermophilus</i> HB27 |           | <i>T. thermophilus</i> HB8 |           |
| IS family                                                                                                    | complete          | partial   | complete              | partial   | complete               | partial   | complete                    | partial   | complete                   | partial   |
| IS1                                                                                                          |                   |           |                       |           | 19                     | 1         |                             |           |                            |           |
| IS1595                                                                                                       |                   |           |                       |           |                        |           |                             |           |                            |           |
| IS3                                                                                                          | 5                 |           |                       |           |                        | 4         | 1                           | 1         |                            |           |
| IS481                                                                                                        |                   |           |                       | 1         |                        |           |                             |           |                            |           |
| IS4                                                                                                          | 3                 | 5         | 21                    | 17        | 6                      | 7         | 1                           | 2         |                            |           |
| ISH3                                                                                                         |                   |           |                       |           |                        |           |                             |           |                            |           |
| IS701                                                                                                        | 1                 | 1         |                       |           | 17                     | 6         | 2                           | 5         |                            | 3         |
| IS1634                                                                                                       |                   |           |                       |           |                        |           | 3                           | 1         |                            |           |
| IS5                                                                                                          | 1                 | 9         | 2                     |           | 10                     | 3         | 6                           | 4         | 7                          | 3         |
| IS1182                                                                                                       |                   |           |                       |           |                        |           |                             |           |                            |           |
| IS6                                                                                                          |                   | 1         |                       |           | 8                      | 6         |                             |           |                            |           |
| IS21                                                                                                         |                   |           |                       |           |                        |           |                             |           |                            |           |
| IS30                                                                                                         |                   | 1         |                       |           |                        |           |                             |           |                            |           |
| IS256                                                                                                        |                   |           |                       |           |                        |           | 1                           | 1         | 8                          |           |
| IS630                                                                                                        | 1                 | 3         | 11                    |           | 1                      |           | 4                           | 3         | 2                          | 2         |
| IS982                                                                                                        | 2                 | 4         |                       |           | 1                      | 1         |                             |           |                            |           |
| ISAs1                                                                                                        |                   |           |                       |           |                        |           |                             |           |                            |           |
| IS66                                                                                                         |                   |           |                       |           |                        |           |                             |           |                            |           |
| IS110                                                                                                        |                   |           |                       |           |                        |           | 2                           | 48        | 3                          | 59        |
| IS91                                                                                                         |                   |           |                       |           |                        |           |                             |           |                            |           |
| IS200/IS605                                                                                                  |                   | 1         | 10                    | 1         | 4                      | 4         |                             |           |                            | 1         |
| IS607                                                                                                        |                   |           |                       |           |                        |           |                             |           |                            |           |
| IS1380                                                                                                       |                   |           |                       |           |                        |           |                             |           |                            |           |
| ISL3                                                                                                         |                   |           |                       |           |                        |           |                             |           |                            |           |
| ISNCY subgroup                                                                                               |                   |           | 1                     |           | 6                      | 4         |                             |           |                            |           |
| ISBst12                                                                                                      |                   |           |                       |           |                        |           |                             |           |                            |           |
| Tn3                                                                                                          |                   |           | 1                     |           |                        | 3         |                             |           |                            |           |
| <b>Total</b>                                                                                                 | <b>13</b>         | <b>25</b> | <b>46</b>             | <b>19</b> | <b>72</b>              | <b>39</b> | <b>20</b>                   | <b>65</b> | <b>20</b>                  | <b>68</b> |
| %                                                                                                            | 0.41              | 0.30      | 1.89                  | 0.44      | 2.23                   | 0.75      | 0.92                        | 0.56      | 1.04                       | 0.32      |
