# Supplementary material for: Alliance of Proteomics and Genomics to Unravel the Specificities of Sahara Bacterium Deinococcus deserti
Source: PLoS Genet. 2009 Mar 27;5(3):e1000434. doi: 10.1371/journal.pgen.1000434 (PMC2669436; doi:10.1371/journal.pgen.1000434)
Supplement: Table S5 — Deinococcus-specific proteins. (0.16 MB PDF) [file pgen.1000434.s010.pdf]

| <b>Table S5. <i>Deinococcus</i>-specific proteins<sup>a</sup></b> |                          |                                       |                               |                                                  |
|-------------------------------------------------------------------|--------------------------|---------------------------------------|-------------------------------|--------------------------------------------------|
|                                                                   | <b><i>D. deserti</i></b> | <b><i>D. radiodurans</i></b>          | <b><i>D. geothermalis</i></b> | <b>Comments<sup>b</sup></b>                      |
| 1                                                                 | Deide_00230 (701 aa)     | DR_2271 (695 aa)                      | Dgeo_0178 (702 aa)            | membrane protein                                 |
| 2                                                                 | Deide_00290 (198 aa)     | DR_0041 (192 aa)                      | Dgeo_0188 (201 aa)            |                                                  |
| 3                                                                 | Deide_00510 (549 aa)     | DR_2348 (559 aa)                      | Dgeo_0055 (529 aa)            | membrane protein                                 |
| 4                                                                 | Deide_00530 (244 aa)     | DR_2347 (332 aa)                      | Dgeo_0056 (236 aa)            | roadblock/LC7 domain                             |
| 5                                                                 | Deide_00710 (156 aa)     | DR_0673 (195 aa)<br>DR_0672 (169 aa)  | Dgeo_2068 (154 aa)            | signal peptide                                   |
| 6                                                                 | Deide_01040 (100 aa)     | DR_2297 (98 aa)                       | Dgeo_0243 (95 aa)             |                                                  |
| 7                                                                 | Deide_01060 (129 aa)     | DR_2295 (137 aa)                      | Dgeo_0245 (131 aa)            |                                                  |
| 8                                                                 | Deide_01100 (166 aa)     | DR_0050 (173 aa)                      | Dgeo_2100 (161 aa)            |                                                  |
| 9                                                                 | Deide_01160 (158 aa)     | DR_0326 (198 aa)                      | Dgeo_2186 (160 aa)            | DdrD, radiation/desiccation-induced <sup>c</sup> |
| 10                                                                | Deide_01210 (126 aa)     | DR_2237 (112 aa)                      | Dgeo_2192 (123 aa)            |                                                  |
| 11                                                                | Deide_01441 (108 aa)     | DR_0850 (105 aa)                      | Dgeo_2321 (98 aa)             |                                                  |
| 12                                                                | Deide_01450 (148 aa)     | DR_0849 (177 aa)                      | Dgeo_2320 (145 aa)            |                                                  |
| 13                                                                | Deide_01520 (60 aa)      | Upstream DR_2353 (60-130 aa)          | Upstream Dgeo_0094 (62 aa)    | membrane protein                                 |
| 14                                                                | Deide_01620 (535 aa)     | DR_2412 (579 aa)<br>DR_A0207 (546 aa) | Dgeo_2134 (536 aa)            | signal peptide                                   |
| 15                                                                | Deide_01640 (103 aa)     | DR_2458 (89 aa)                       | Dgeo_0197 (89 aa)             | membrane protein                                 |
| 16                                                                | Deide_01660 (265 aa)     | DR_2232 (276 aa)                      | Dgeo_0273 (263 aa)            | membrane protein                                 |
| 17                                                                | Deide_01720 (147 aa)     | DR_1216 (158 aa)                      | Dgeo_2178 (150 aa)            | signal peptide                                   |
| 18                                                                | Deide_01920 (88 aa)      | DR_2016 (79 aa)                       | Dgeo_2311 (62 aa)             | signal peptide                                   |
| 19                                                                | Deide_02000 (756 aa)     | DR_0685 (713 aa)<br>DR_B0037 (691 aa) | Dgeo_0309 (762 aa)            | signal peptide                                   |
| 20                                                                | Deide_02350 (107 aa)     | DR_2378 (93 aa)                       | Dgeo_0113 (101 aa)            |                                                  |
| 21                                                                | Deide_02370 (164 aa)     | DR_2527 (188 aa)                      | Dgeo_0115 (158 aa)            | signal peptide                                   |
| 22                                                                | Deide_02380 (106 aa)     | Downstream DR_2376 (> 42 aa ?)        | Dgeo_0116 (94 aa)             |                                                  |
| 23                                                                | Deide_02660 (458 aa)     | DR_2599 (481 aa)                      | Dgeo_0265 (457 aa)            | signal peptide                                   |
| 24                                                                | Deide_02720 (71 aa)      | DR_0338 (128 aa)                      | Dgeo_0209 (129 aa)            | radiation/desiccation-induced <sup>c</sup>       |
| 25                                                                | Deide_02990 (178 aa)     | DR_0070 (199 aa)                      | Dgeo_0295 (178 aa)            | DdrB, radiation/desiccation-induced <sup>c</sup> |
| 26                                                                | Deide_03030 (281 aa)     | DR_0167 (328 aa)                      | Dgeo_0395 (289 aa)            | DNA repair regulator protein IrrE/PprI           |
| 27                                                                | Deide_03060 (169 aa)     | DR_1212 (168 aa)                      | Dgeo_0399 (155 aa)            | signal peptide                                   |
| 28                                                                | Deide_03070 (103 aa)     | DR_0040 (158 aa)                      | Dgeo_0400 (104 aa)            |                                                  |
| 29                                                                | Deide_03100 (135 aa)     | DR_2281 (164 aa)                      | Dgeo_1892 (176 aa)            | dsRNA binding motif                              |
| 30                                                                | Deide_03200 (56 aa)      | Downstream DR_1936 (56 aa)            | Dgeo_0456 (56 aa)             | membrane protein                                 |
| 31                                                                | Deide_03260 (102 aa)     | DR_0355 (102 aa)                      | Dgeo_0462 (102 aa)            |                                                  |
| 32                                                                | Deide_03380 (700 aa)     | DR_0458 (839 aa)                      | Dgeo_1752 (636 aa)            | Pro+Gly-rich protein                             |
| 33                                                                | Deide_03710 (194 aa)     | DR_1987 (210 aa)                      | Dgeo_2200 (181 aa)            | membrane protein                                 |

|    |                      |                                                   |                            |                                                              |
|----|----------------------|---------------------------------------------------|----------------------------|--------------------------------------------------------------|
| 34 | Deide_03750 (206 aa) | DR_2136 (206 aa)                                  | Dgeo_0585 (217 aa)         |                                                              |
| 35 | Deide_04010 (287 aa) | DR_1887 (252 aa)                                  | Dgeo_0583 (275 aa)         | membrane protein                                             |
| 36 | Deide_04070 (250 aa) | DR_1575 (215 aa)                                  | Dgeo_0487 (245 aa)         |                                                              |
| 37 | Deide_04150 (219 aa) | DR_2554 (222 aa)                                  | Dgeo_0415 (213aa)          | membrane protein                                             |
| 38 | Deide_04171 (66 aa)  | DR_0047 (65 aa)                                   | Dgeo_0418 (63 aa)          |                                                              |
| 39 | Deide_04200 (262 aa) | DR_2504 (274 aa)                                  | Dgeo_0421 (260 aa)         | Zn-finger?                                                   |
| 40 | Deide_04350 (390 aa) | DR_0571 (397 aa)                                  | Dgeo_1766 (386aa)          |                                                              |
| 41 | Deide_04380 (358 aa) | DR_0574 (370 aa)                                  | Dgeo_1769 (370 aa)         | signal peptide                                               |
| 43 | Deide_04431 (136 aa) | DR_0239 (134 aa)                                  | Dgeo_1778 (116 aa)         |                                                              |
| 44 | Deide_04602 (802 aa) | DR_2528 (503 aa)                                  | Dgeo_1912 (709 aa)         |                                                              |
| 45 | Deide_04830 (71 aa)  | DR_0746 (79 aa)                                   | Dgeo_2024 (72 aa)          |                                                              |
| 46 | Deide_04970 (88 aa)  | DR_1896 (94 aa)                                   | Dgeo_1399 (95 aa)          |                                                              |
| 47 | Deide_05301 (281 aa) | DR_1138 (254 aa)                                  | Dgeo_0932 (189 aa)         | signal peptide                                               |
| 48 | Deide_05360 (150 aa) | DR_1607 (144 aa)                                  | Dgeo_0935 (134 aa)         |                                                              |
| 49 | Deide_05400 (181 aa) | DR_1405 + DR_1404<br>(107 aa + 73 aa, Frameshift) | Dgeo_1646 (178 aa)         | signal peptide                                               |
| 51 | Deide_05410 (153 aa) | DR_1406 (157 aa)                                  | Dgeo_1645 (280 aa)         | signal peptide ?                                             |
| 52 | Deide_05420 (325 aa) | DR_1407 (365 aa)                                  | Dgeo_1644 (311 aa)         | signal peptide                                               |
| 53 | Deide_05471 (99aa)   | DR_0212 (101aa)                                   | Dgeo_0482 (102aa)          |                                                              |
| 54 | Deide_06160 (163 aa) | DR_2077 (169 aa)                                  | Dgeo_1527 (165 aa)         |                                                              |
| 55 | Deide_06180 (182 aa) | DR_1768 (134 aa)                                  | Dgeo_1530 (188 aa)         | signal peptide                                               |
| 56 | Deide_06300 (344 aa) | DR_1226 (363 aa)                                  | Dgeo_0558 (341 aa)         |                                                              |
| 57 | Deide_06690 (173 aa) | DR_0150 (173 aa)                                  | Dgeo_1950 (190 aa)         |                                                              |
| 58 | Deide_06760 (98 aa)  | DR_0634 (98 aa)                                   | Dgeo_1954 (98 aa)          | membrane protein                                             |
| 59 | Deide_07131 (118 aa) | DR_1125 (115 aa)                                  | Dgeo_1598 (110 aa)         | membrane protein                                             |
| 60 | Deide_07430 (183 aa) | DR_1590 (183 aa)                                  | Dgeo_1972 (183aa)          |                                                              |
| 61 | Deide_07560 (51 aa)  | Between DR_1662/DR_1663<br>(46 aa)                | Upstream Dgeo_0448 (50 aa) |                                                              |
| 62 | Deide_07850 (170 aa) | DR_0072 (179 aa)                                  | Dgeo_1688 (146 aa)         |                                                              |
| 63 | Deide_07860 (105 aa) | DR_1272 (102 aa)                                  | Dgeo_1687 (108aa)          | membrane protein                                             |
| 64 | Deide_08155 (67 aa)  | DR_1455 (98 aa)                                   | Dgeo_1311 (67 aa)          | possible regulator, HTH_MerR-trunc                           |
| 65 | Deide_08161 (248 aa) | DR_1454 (238 aa)                                  | Dgeo_1310 (239 aa)         |                                                              |
| 66 | Deide_08270 (347 aa) | DR_0343 (340 aa)                                  | Dgeo_1250 (345 aa)         | membrane protein                                             |
| 67 | Deide_08510 (200 aa) | DR_1172 (298 aa)                                  | Dgeo_1473 (236 aa)         | desiccation-associated                                       |
| 68 | Deide_08520 (122 aa) | DR_1615 (124 aa)                                  | Dgeo_1472 (125 aa)         |                                                              |
| 69 | Deide_08640 (123 aa) | DR_0895 (128 aa)                                  | Dgeo_0762 (141 aa)         | membrane protein                                             |
| 70 | Deide_08680 (129 aa) | DR_1867 (120 aa)                                  | Dgeo_0767 (119 aa)         | membrane protein                                             |
| 71 | Deide_08750 (156 aa) | DR_1465 (188 aa)                                  | Dgeo_0817 (158 aa)         | membrane protein, radiation/desiccation-induced <sup>c</sup> |
| 72 | Deide_08780 (456 aa) | DR_1469 (477 aa)                                  | Dgeo_0820 (461 aa)         | signal peptide, cell wall hydrolase/autolysin                |

|     |                      |                                                                      |                    |                                                            |
|-----|----------------------|----------------------------------------------------------------------|--------------------|------------------------------------------------------------|
| 73  | Deide_08790 (180 aa) | DR_1470 (179 aa)                                                     | Dgeo_0821 (179 aa) | signal peptide                                             |
| 74  | Deide_08920 (116 aa) | DR_1254 (114 aa)                                                     | Dgeo_1000 (109 aa) | membrane protein                                           |
| 75  | Deide_09220 (87 aa)  | DR_1847 (90 aa)                                                      | Dgeo_0982 (91 aa)  | membrane protein                                           |
| 76  | Deide_09250 (334 aa) | DR_1673 (348 aa)                                                     | Dgeo_1457 (324 aa) |                                                            |
| 77  | Deide_09300 (329 aa) | DR_0857 (285 aa)                                                     | Dgeo_1450 (336 aa) | membrane protein                                           |
| 78  | Deide_09320 (232 aa) | DR_0858 (231 aa)                                                     | Dgeo_1448(226 aa)  | membrane protein                                           |
| 79  | Deide_09460 (279 aa) | DR_1699 (262 aa)                                                     | Dgeo_0997 (266 aa) | signal peptide                                             |
| 80  | Deide_09710 (166 aa) | DR_1372 (164 aa)                                                     | Dgeo_1551 (166 aa) | signal peptide, desiccation-associated                     |
| 81  | Deide_09711 (382 aa) | DR_1371 (313 aa)                                                     | Dgeo_1552 (325 aa) | signal peptide                                             |
| 82  | Deide_09720 (225 aa) | DR_1370 (216 aa)                                                     | Dgeo_1553 (239 aa) | signal peptide, radiation/desiccation-induced <sup>c</sup> |
| 83  | Deide_09750 (105aa)  | DR_0889 (116 aa)                                                     | Dgeo_1518 (116 aa) |                                                            |
| 84  | Deide_09950 (284 aa) | DR_2090 (553 aa)                                                     | Dgeo_1009 (276 aa) |                                                            |
| 85  | Deide_10100 (175 aa) | DR_1584 (152 aa)                                                     | Dgeo_2428 (259 aa) |                                                            |
| 86  | Deide_10190 (174 aa) | DR_1242 (180 aa)                                                     | Dgeo_0743 (173 aa) | signal peptide                                             |
| 87  | Deide_10201 (254 aa) | DR_A0140 (272 aa)                                                    | Dgeo_0741 (272 aa) |                                                            |
| 88  | Deide_10332 (140 aa) | DR_0409 (139 aa)                                                     | Dgeo_0683 (154 aa) |                                                            |
| 89  | Deide_10362 (114 aa) | DR_1821 (126 aa)                                                     | Dgeo_1238 (120 aa) | signal peptide                                             |
| 90  | Deide_10421 (100 aa) | DR_1421 (93 aa)                                                      | Dgeo_0677 (92 aa)  |                                                            |
| 91  | Deide_10480 (291 aa) | DR_1527 + DR_1528<br>(133 aa + 141 aa, Frameshift)                   | Dgeo_1144 (282 aa) | tetratricopeptide repeat (TPR) domain                      |
| 92  | Deide_10710 (205 aa) | DR_0795 (211 aa)                                                     | Dgeo_1478 (206 aa) |                                                            |
| 93  | Deide_10940 (287 aa) | DR_2569 (270 aa)                                                     | Dgeo_1038 (288 aa) | signal peptide                                             |
| 94  | Deide_11000 (507 aa) | DR_1179 (548 aa)                                                     | Dgeo_1011 (496 aa) |                                                            |
| 95  | Deide_11010 (156aa)  | DR_1882 (142 aa)                                                     | Dgeo_1351 (160 aa) |                                                            |
| 96  | Deide_11030 (65 aa)  | DR_1429 (67 aa)                                                      | Dgeo_1349 (57 aa)  |                                                            |
| 97  | Deide_11101 (433 aa) | DR_0969 (428 aa)<br>DR_1923+DR_1924<br>(276 aa + 168 aa, Frameshift) | Dgeo_1339 (432 aa) | signal peptide                                             |
| 98  | Deide_11270 (171 aa) | DR_1416 (210aa)                                                      | Dgeo_1220 (168 aa) |                                                            |
| 99  | Deide_11331 (317 aa) | DR_1195 (296 aa)                                                     | Dgeo_0865 (316 aa) | membrane protein                                           |
| 100 | Deide_11471 (122 aa) | DR_1364 (155 aa)                                                     | Dgeo_1119 (122 aa) | signal peptide                                             |
| 101 | Deide_11690 (189 aa) | DR_1249 (192 aa)                                                     | Dgeo_1098 (189 aa) | signal peptide                                             |
| 102 | Deide_11730 (152 aa) | DR_1245 (165 aa)                                                     | Dgeo_1085 (153 aa) |                                                            |
| 103 | Deide_11790 (75 aa)  | DR_0734 (95 aa)                                                      | Dgeo_1022 (74 aa)  |                                                            |
| 104 | Deide_11810 (65 aa)  | DR_2157 (67 aa)                                                      | Dgeo_0880 (67 aa)  |                                                            |
| 105 | Deide_12030 (390 aa) | DR_1985 (424 aa)                                                     | Dgeo_1291 (387 aa) | signal peptide, distantly related to beta-lactamase        |
| 106 | Deide_12320 (376 aa) | DR_1480 (526 aa)                                                     | Dgeo_1193 (375 aa) | signal peptide ?                                           |
| 107 | Deide_12361 (127 aa) | DR_1788 (127 aa)                                                     | Dgeo_1431 (121 aa) | signal peptide                                             |
| 108 | Deide_12380 (103 aa) | DR_1786 (102 aa)                                                     | Dgeo_1429 (103 aa) |                                                            |

|     |                      |                                                    |                               |                                                               |
|-----|----------------------|----------------------------------------------------|-------------------------------|---------------------------------------------------------------|
| 109 | Deide_12410 (419 aa) | DR_1781 (437 aa)                                   | Dgeo_1031 (430 aa)            |                                                               |
| 110 | Deide_12461 (168 aa) | DR_2161 (177aa)                                    | Dgeo_0883 (179 aa)            |                                                               |
| 111 | Deide_12490 (106 aa) | DR_0993 (116 aa)                                   | Dgeo_1020 (99 aa)             |                                                               |
| 112 | Deide_12670 (93 aa)  | DR_1104 (95 aa)                                    | Dgeo_1213 (104 aa)            |                                                               |
| 113 | Deide_12750 (200 aa) | DR_1770 (247 aa)                                   | Dgeo_0693 (206 aa)            | membrane protein                                              |
| 114 | Deide_13140 (132 aa) | DR_0452 (132 aa)                                   | Dgeo_1056 (132 aa)            |                                                               |
| 115 | Deide_13260 (646 aa) | DR_1448 + DR_1447<br>(426 aa + 449 aa, Frameshift) | Dgeo_1379 (649 aa)            | signal peptide                                                |
| 116 | Deide_13261 (150 aa) | DR_1446 (142 aa)                                   | Dgeo_1378 (149 aa)            | signal peptide                                                |
| 117 | Deide_13540 (133 aa) | DR_1464 (159 aa)                                   | Dgeo_1161 (75 aa)             | signal peptide                                                |
| 118 | Deide_13590 (93 aa)  | DR_1539 (110 aa)                                   | Dgeo_1167 (89 aa)             |                                                               |
| 119 | Deide_13760 (598 aa) | DR_0060 + DR_0061<br>(142 aa + 478 aa, Frameshift) | Dgeo_0727 (591 aa)            |                                                               |
| 120 | Deide_13820 (136 aa) | Reverse DR_0818 (130 aa)                           | Dgeo_0854 (133 aa)            |                                                               |
| 121 | Deide_13990 (273 aa) | DR_1178 (278 aa)                                   | Dgeo_1258 (271 aa)            | distantly related to Phenazine biosynthesis PhzC/PhzF protein |
| 122 | Deide_14021 (404 aa) | DR_0938 (395 aa)                                   | Dgeo_0631 (395 aa)            | sporulation related domain                                    |
| 123 | Deide_14071 (167 aa) | DR_1744 (170 aa)                                   | Dgeo_1611 (166 aa)            |                                                               |
| 124 | Deide_14160 (142 aa) | DR_2172 (139 aa)                                   | Dgeo_1591 (140 aa)            | signal peptide                                                |
| 125 | Deide_14240 (262 aa) | DR_1397 (262 aa)                                   | Dgeo_1619 (262 aa)            | related to N-formylglutamate amidohydrolase                   |
| 126 | Deide_14280 (281 aa) | DR_1293 (276 aa)                                   | Dgeo_0595 (260 aa)            | membrane protein                                              |
| 127 | Deide_14300 (122 aa) | DR_1990 (129 aa)                                   | Downstream Dgeo_0594 (123 aa) | signal peptide                                                |
| 128 | Deide_14350 (95 aa)  | DR_0920 (87 aa)                                    | Dgeo_0477 (92 aa)             |                                                               |
| 129 | Deide_14630 (76 aa)  | DR_0637 (77aa)                                     | Dgeo_1639 (77 aa)             |                                                               |
| 130 | Deide_14640 (142 aa) | DR_0638 (142aa)                                    | Dgeo_1640 (142 aa)            | membrane protein                                              |
| 131 | Deide_14700 (217 aa) | DR_1832 (211aa)                                    | Dgeo_1464 (219 aa)            |                                                               |
| 132 | Deide_14710 (281 aa) | DR_1831 (291aa)                                    | Dgeo_1465 (279 aa)            |                                                               |
| 133 | Deide_14720 (134 aa) | DR_1830 (139 aa)                                   | Dgeo_1466 (140 aa)            |                                                               |
| 134 | Deide_14730 (552 aa) | DR_1829 (533 aa)                                   | Dgeo_1467 (537 aa)            | membrane protein                                              |
| 135 | Deide_14870 (190 aa) | DR_0877 (114 aa)                                   | Dgeo_1814 (186 aa)            |                                                               |
| 136 | Deide_14981 (230 aa) | DR_1425 (206 aa)                                   | Dgeo_0940 (231 aa)            | signal peptide                                                |
| 137 | Deide_14990 (168 aa) | DR_1320 (176 aa)                                   | Dgeo_0939 (173 aa)            | signal peptide                                                |
| 138 | Deide_15020 (68 aa)  | DR_1840 (79 aa)                                    | Dgeo_1651 (83 aa)             |                                                               |
| 139 | Deide_15100 (168 aa) | DR_1422 (190 aa)                                   | Dgeo_1671 (167 aa)            | radiation/desiccation-induced <sup>c</sup>                    |
| 140 | Deide_15270 (56 aa)  | DR_0800 (60 aa)                                    | Dgeo_2088 (68 aa)             | radiation/desiccation-induced <sup>c</sup>                    |
| 141 | Deide_15290 (126 aa) | DR_1140 (124 aa)                                   | Dgeo_0837 (127 aa)            | signal peptide                                                |
| 142 | Deide_15291 (138 aa) | DR_1139 (131 aa)                                   | Dgeo_0836 (132 aa)            | distantly related to inorganic pyrophosphatase                |
| 143 | Deide_15380 (342 aa) | DR_1557 (343 aa)                                   | Dgeo_1707 (351 aa)            |                                                               |
| 144 | Deide_15470 (160 aa) | DR_0909 (160 aa)                                   | Dgeo_1532 (171 aa)            | membrane protein                                              |

|     |                      |                                                    |                               |                                          |
|-----|----------------------|----------------------------------------------------|-------------------------------|------------------------------------------|
| 145 | Deide_15480 (708 aa) | DR_0904 + DR_0903<br>(369 aa + 518 aa, Frameshift) | Dgeo_0547 (656 aa)            | signal peptide, vWA domain               |
| 146 | Deide_15730 (104 aa) | DR_2020 (131 aa)                                   | Dgeo_1783 (99 aa)             |                                          |
| 147 | Deide_15900 (244 aa) | DR_0554 (244 aa)                                   | Dgeo_1941 (219 aa)            |                                          |
| 148 | Deide_15980 (192 aa) | Reverse DR_0869 (228 aa)                           | Reverse Dgeo_0511 (215 aa)    |                                          |
| 149 | Deide_16050 (238 aa) | DR_0864 (293 aa)                                   | Dgeo_0520 (285 aa)            |                                          |
| 150 | Deide_16060 (254 aa) | DR_0863 (295 aa)                                   | Dgeo_0521 (270 aa)            | membrane protein                         |
| 151 | Deide_16110 (168 aa) | DR_1748 (162 aa)                                   | Dgeo_0507 (152 aa)            |                                          |
| 152 | Deide_16251 (99 aa)  | DR_2001 (103 aa)                                   | Dgeo_0440 (100 aa)            |                                          |
| 153 | Deide_16260 (128 aa) | DR_2002 (129 aa)                                   | Dgeo_1961 (127 aa)            |                                          |
| 154 | Deide_16270 (178 aa) | DR_2003 (210 aa)                                   | Dgeo_1962 (166 aa)            | signal peptide                           |
| 155 | Deide_16430 (93 aa)  | DR_0600 (79 aa)                                    | Dgeo_1997 (101 aa)            |                                          |
| 156 | Deide_16470 (316 aa) | DR_1597 (312 aa)                                   | Dgeo_1975 (323 aa)            |                                          |
| 157 | Deide_16551 (287 aa) | DR_1693 (250 aa)                                   | Dgeo_0542 (184 aa)            |                                          |
| 158 | Deide_16650 (73 aa)  | Reverse DR_0371 (73 aa)                            | Dgeo_1881 (73 aa)             |                                          |
| 159 | Deide_16690 (165 aa) | DR_1962 (170 aa)                                   | Dgeo_1885 (184 aa)            |                                          |
| 160 | Deide_16890 (121 aa) | DR_1269 (124 aa)                                   | Dgeo_1592 (152 aa)            | membrane protein                         |
| 161 | Deide_17000 (223 aa) | DR_1388 (217 aa)                                   | Dgeo_0664 (211 aa)            | signal peptide                           |
| 162 | Deide_17180 (123 aa) | DR_1121 (126 aa)                                   | Dgeo_1382 (124 aa)            |                                          |
| 163 | Deide_17470 (93 aa)  | DR_1697 (86 aa)                                    | Dgeo_0142 (91 aa)             |                                          |
| 164 | Deide_17520 (244 aa) | DR_0714 (266 aa)                                   | Dgeo_1717 (243 aa)            | membrane protein                         |
| 165 | Deide_17591 (309 aa) | DR_0769 (267 aa)                                   | Dgeo_1724 (258 aa)            | signal peptide                           |
| 166 | Deide_17770 (625 aa) | DR_0855 (656 aa)                                   | Dgeo_1817 (637 aa)            | signal peptide                           |
| 167 | Deide_17940 (97 aa)  | DR_1432 (89 aa)                                    | Dgeo_1393 (96aa)              |                                          |
| 168 | Deide_17950 (382 aa) | DR_1414 (527 aa)                                   | Dgeo_1392 (302 aa)            | membrane protein, Ala+Pro-rich protein   |
| 169 | Deide_17971 (53 aa)  | DR_1463 (97 aa)                                    | Downstream Dgeo_1389 (49 aa)  | signal peptide ?                         |
| 170 | Deide_18050 (313 aa) | DR_1116 (341 aa)                                   | Dgeo_1437 (300 aa)            |                                          |
| 171 | Deide_18130 (61 aa)  | DR_1331 (81 aa)                                    | Dgeo_0501 (57 aa)             |                                          |
| 172 | Deide_18240 (199 aa) | Reverse DR_0931 (Frameshift?)                      | Downstream Dgeo_0497 (199 aa) | membrane protein                         |
| 173 | Deide_18480 (108 aa) | DR_0887 (128 aa)                                   | Dgeo_1823 (106 aa)            |                                          |
| 174 | Deide_18980 (144aa)  | DR_0308 (147 aa)                                   | Dgeo_1870 (138 aa)            | membrane protein                         |
| 175 | Deide_19055 (72 aa)  | DR_1936 (68 aa)                                    | Dgeo_2113 (70 aa)             |                                          |
| 176 | Deide_19131 (131 aa) | DR_0359 (159 aa)                                   | Dgeo_2126 (163 aa)            | membrane protein                         |
| 177 | Deide_19231 (54 aa)  | DR_2230 (75 aa)                                    | Dgeo_0191 (90 aa)             |                                          |
| 178 | Deide_19320 (108aa)  | DR_0218 (146 aa)                                   | Dgeo_2204 (131 aa)            |                                          |
| 179 | Deide_19410 (184 aa) | DR_2229 (175 aa)                                   | Dgeo_0384 (146 aa)            |                                          |
| 180 | Deide_19481 (237 aa) | DR_2342 (220 aa)                                   | Dgeo_2142 (217 aa)            |                                          |
| 181 | Deide_19530 (149 aa) | DR_2344 (177 aa)                                   | Dgeo_2146 (178 aa)            | signal peptide                           |
| 182 | Deide_19650 (129 aa) | DR_0947 (116 aa)                                   | Dgeo_0259 (143 aa)            | candidate isochorismatase family protein |

|     |                                                |                                                    |                                |                                                              |
|-----|------------------------------------------------|----------------------------------------------------|--------------------------------|--------------------------------------------------------------|
| 183 | Deide_19741 (157 aa)                           | DR_2006 (157 aa)                                   | Dgeo_0289 (163 aa)             |                                                              |
| 184 | Deide_19870 (248 aa)                           | DR_0449 (243 aa)                                   | Dgeo_0137 (246 aa)             |                                                              |
| 185 | Deide_19890 (230 aa)                           | DR_1210 (225 aa)                                   | Dgeo_0371 (241 aa)             |                                                              |
| 186 | Deide_19972 (311aa)                            | DR_0269 (322 aa)                                   | Dgeo_0364 (248 aa)             | Gly-rich protein                                             |
| 187 | Deide_20360 (195 aa)                           | DR_2500 (157 aa)                                   | Dgeo_2163 (198 aa)             |                                                              |
| 188 | Deide_20411 (83 aa)                            | DR_2314 (117 aa)                                   | Dgeo_0383 (119 aa)             |                                                              |
| 189 | Deide_20560 (551 aa)                           | DR_2572 + DR_2573<br>(496 aa + 103 aa, Frameshift) | Dgeo_0337 (501 aa)             | membrane protein, radiation/desiccation-induced <sup>c</sup> |
| 190 | Deide_20570 (129 aa)<br>Deide_3p02170 (129 aa) | DR_2574 (131 aa)                                   | Dgeo_0336 (140 aa)             | DdrO, radiation/desiccation-induced <sup>c</sup>             |
| 191 | Deide_20641 (82 aa)                            | Reverse DR_0438 (92 aa)                            | Dgeo_0322 (82 aa)              | correct DdrH, radiation/desiccation-induced <sup>c</sup>     |
| 192 | Deide_20645 (64 aa)                            | DR_0437 (72 aa)                                    | Dgeo_0320 (65 aa)              |                                                              |
| 193 | Deide_20690 (83 aa)                            | Upstream DR_0433 (84 aa)                           | Upstream Dgeo_0316 (82-105 aa) |                                                              |
| 194 | Deide_20710 (160 aa)                           | DR_2018 (193 aa)                                   | Dgeo_0314 (149 aa)             | membrane protein                                             |
| 195 | Deide_20990 (97 aa)                            | DR_0296 (98 aa)                                    | Dgeo_0218 (104 aa)             |                                                              |
| 196 | Deide_21020 (213 aa)                           | DR_2183 (210 aa)                                   | Dgeo_2478 (198 aa)             |                                                              |
| 197 | Deide_21230 (445 aa)                           | DR_1308 (447 aa)                                   | Dgeo_0277 (447 aa)             | signal peptide, related to peptidases                        |
| 198 | Deide_21250 (142 aa)                           | DR_2240 (142 aa)                                   | Dgeo_0275 (141 aa)             |                                                              |
| 199 | Deide_21340 (73 aa)<br>Deide_2p01315 (63 aa)   | DR_2563 (70 aa)                                    | Dgeo_0465 (72 aa)              | radiation/desiccation-induced <sup>c</sup>                   |
| 200 | Deide_21400 (79 aa)                            | DR_2559 (75 aa)                                    | Dgeo_0061 (80 aa)              |                                                              |
| 201 | Deide_21470 (162 aa)<br>Deide_3p01970 (158 aa) | DR_0082 (154 aa)<br>DR_2593 (185 aa)               | Dgeo_0413 (115-166 aa)         | Gly-rich protein                                             |
| 202 | Deide_21480 (88 aa)                            | DR_0545 (95 aa)                                    | Dgeo_0616 (90 aa)              | membrane protein                                             |
| 203 | Deide_21660 (301 aa)                           | DR_0067 (309 aa)                                   | Dgeo_2257 (301 aa)             |                                                              |
| 204 | Deide_21670 (121aa)                            | DR_0068 (124 aa)                                   | Dgeo_2258 (124 aa)             | membrane protein                                             |
| 205 | Deide_22050 (238 aa)                           | DR_1202 (249 aa)                                   | Dgeo_2082 (270aa)              | signal peptide                                               |
| 206 | Deide_22420 (99 aa)                            | DR_0360 (143 aa)                                   | Dgeo_2093 (122 aa)             |                                                              |
| 207 | Deide_22690 (171 aa)                           | DR_2558 (156 aa)                                   | Dgeo_2325 (192 aa)             |                                                              |
| 208 | Deide_22781 (295 aa)                           | DR_2159 (255 aa)                                   | Dgeo_2233 (251 aa)             | signal peptide                                               |
| 209 | Deide_22790 (394aa)                            | DR_2334 (386 aa)                                   | Dgeo_0035 (391 aa)             |                                                              |
| 210 | Deide_22810 (95 aa)                            | DR_0021 (88 aa)                                    | Dgeo_0033 (96 aa)              |                                                              |
| 211 | Deide_22830 (289 aa)                           | DR_0019 (293 aa)                                   | Dgeo_0031 (289 aa)             |                                                              |
| 212 | Deide_22840 (219 aa)                           | DR_0018 (205 aa)                                   | Dgeo_0030 (206 aa)             |                                                              |
| 213 | Deide_22945 (89 aa)                            | DR_2292 (85 aa)                                    | Dgeo_0039 (75 aa)              |                                                              |
| 214 | Deide_23110 (385 aa)                           | DR_0121 (449 aa)                                   | Dgeo_2293 (384 aa)             | signal peptide, tetratricopeptide repeat (TPR) domain        |
| 215 | Deide_23280 (232 aa)                           | Reverse DR_0003 (291 aa)                           | Reverse Dgeo_0047 (223 aa)     | correct DdrC, radiation/desiccation-induced <sup>c</sup>     |
| 216 | Deide_23300 (545 aa)                           | DR_2489 (477 aa)                                   | Dgeo_0179 (579 aa)             |                                                              |
| 217 | Deide_23320 (80 aa)                            | DR_0124 (94 aa)                                    | Dgeo_2267 (78 aa)              |                                                              |

|     |                                                  |                                       |                                          |                                                            |
|-----|--------------------------------------------------|---------------------------------------|------------------------------------------|------------------------------------------------------------|
| 218 | Deide_23410 (106 aa)                             | DR_0015 (118 aa)                      | Dgeo_2336 (108 aa)                       |                                                            |
| 219 | Deide_23460 (77 aa)                              | DR_0031 (80 aa)                       | Dgeo_2340 (77 aa)                        | membrane protein                                           |
| 220 | Deide_23480 (137 aa)                             | DR_2414 (157 aa)                      | Dgeo_2342 (147 aa)                       | signal peptide, radiation/desiccation-induced <sup>c</sup> |
| 221 | Deide_1p00071 (440 aa)<br>Deide_3p02680 (429 aa) | DR_B0145 (397 aa)                     | Dgeo_2497 (467 aa)                       | related to plasmid replication initiator protein           |
| 222 | Deide_1p01253 (160 aa)                           | DR_A0141 (144 aa)                     | Dgeo_2285 (151 aa)<br>Dgeo_2915 (163 aa) |                                                            |
| 223 | Deide_1p01530 (90 aa)                            | DR_0545 (90 aa)                       | Dgeo_0616 (90 aa)                        | membrane protein                                           |
| 224 | Deide_1p01584 (590 aa)                           | DR_2489 (477 aa)                      | Dgeo_0179 (579 aa)                       | signal peptide                                             |
| 225 | Deide_2p00020 (231 aa)                           | DR_2215 (260 aa)                      | Dgeo_2492 (237 aa)                       |                                                            |
| 226 | Deide_2p00100 (395 aa)                           | DR_A0217 (394 aa)                     | Dgeo_2412 (386 aa)                       |                                                            |
| 227 | Deide_2p00260 (521 aa)                           | DR_A0207 (546 aa)<br>DR_2412 (579 aa) | Dgeo_2134 (536 aa)                       | signal peptide                                             |
| 227 | Deide_2p01100 (287 aa)                           | DR_A0182 (268 aa)                     | Dgeo_2942 (319 aa)                       |                                                            |
| 228 | Deide_2p01380 (294 aa)                           | DR_A0346 (300 aa)                     | Dgeo_2628 (302 aa)                       | PprA, radiation/desiccation-induced <sup>c</sup>           |
| 229 | Deide_2p02110 (168 aa)                           | DR_A0252 (154 aa)                     | Dgeo_2407 (156 aa)                       | candidate transcriptional regulator, MER family            |
| 230 | Deide_2p02131 (247 aa)                           | DR_0367 (266 aa)                      | Dgeo_2187 (243 aa)                       |                                                            |

<sup>a</sup> *Deinococcus*-specific proteins have at least 30% identity and 70% coverage using Blastp analysis, whereas hits with proteins from other organisms, if present, do not fulfill these criteria. After manual inspection, several other *Deinococcus*-specific proteins were added, including those for which frameshifts were observed, those requiring reversion of gene orientation and non-predicted proteins. Proteins in grey were identified in the proteome analysis after standard cultivation.

<sup>b</sup> TMHMM was used to predict transmembrane  $\alpha$ -helices, and SignalP, TatP and LipoP to predict signal peptides (1). A protein was considered a membrane protein when at least two transmembrane segments were predicted.

<sup>c</sup> Radiation and/or desiccation-induced gene in *D. radiodurans* (2)

1. Emanuelsson O, Brunak S, von Heijne G, Nielsen H (2007) Locating proteins in the cell using TargetP, SignalP and related tools. Nat Protoc 2: 953-971.

2. Tanaka M, Earl AM, Howell HA, Park MJ, Eisen JA, et al. (2004) Analysis of *Deinococcus radiodurans*'s transcriptional response to ionizing radiation and desiccation reveals novel proteins that contribute to extreme radioresistance. Genetics 168: 21-33.
