# Supplementary material for: Alliance of Proteomics and Genomics to Unravel the Specificities of Sahara Bacterium Deinococcus deserti
Source: PLoS Genet. 2009 Mar 27;5(3):e1000434. doi: 10.1371/journal.pgen.1000434 (PMC2669436; doi:10.1371/journal.pgen.1000434)
Supplement: Table S7 — Mn- and Fe- transport and regulation related systems in D. deserti. (0.08 MB PDF) [file pgen.1000434.s012.pdf]

| Table S7. Mn- and Fe- transport and regulation related systems in <i>D. deserti</i> |                                                                                   |           |                                   |                                   |                               |                   |
|-------------------------------------------------------------------------------------|-----------------------------------------------------------------------------------|-----------|-----------------------------------|-----------------------------------|-------------------------------|-------------------|
| A. Mn-transport and regulation related systems                                      |                                                                                   |           |                                   |                                   |                               |                   |
| COG number                                                                          | Protein annotation                                                                | Name      | <i>D. radiodurans</i><br>ortholog | <i>D. geothermali</i><br>ortholog | <i>D. deserti</i><br>ortholog | Spectral<br>count |
| COG1108                                                                             | ABC-type Mn <sup>2+</sup> /Zn <sup>2+</sup> transport system (permease component) | ZnuB      | -                                 | -                                 | Deide_3p02750                 | 0                 |
| COG0803                                                                             | ABC-type Mn/Zn transport system (periplasmic component)                           | FimA/TroA | DR_2523                           | Dgeo_0534                         | Deide_07330                   | 3                 |
| COG0803                                                                             | ABC-type Mn/Zn transport system (periplasmic component)                           | FimA/TroA | -                                 | -                                 | Deide_3p02720                 | 2                 |
| COG0803                                                                             | ABC-type Mn/Zn transport system (periplasmic component)                           | FimA/TroA | -                                 | -                                 | Deide_2p01321                 | 0                 |
| COG0803                                                                             | ABC-type Mn/Zn transport system (periplasmic component)                           | FimA/TroA | -                                 | -                                 | Deide_1p00820                 | 0                 |
| COG1108                                                                             | ABC-type Mn <sup>2+</sup> /Zn <sup>2+</sup> transport system (permease component) | ZnuB      | DR_2283                           | Dgeo_0532                         | Deide_07190                   | 0                 |
| COG1108                                                                             | ABC-type Mn <sup>2+</sup> /Zn <sup>2+</sup> transport system (permease component) | ZnuB      | -                                 | -                                 | Deide_3p02740                 | 0                 |
| COG1108                                                                             | ABC-type Mn <sup>2+</sup> /Zn <sup>2+</sup> transport system (permease component) | ZnuB      | -                                 | -                                 | Deide_2p01340                 | 0                 |
| COG1108                                                                             | ABC-type Mn <sup>2+</sup> /Zn <sup>2+</sup> transport system (permease component) | ZnuB      | -                                 | -                                 | Deide_2p01350                 | 0                 |
| COG1108                                                                             | ABC-type Mn <sup>2+</sup> /Zn <sup>2+</sup> transport system (permease component) | ZnuB      | -                                 | -                                 | Deide_3p02750                 | 0                 |
| COG1121                                                                             | ABC-type Mn/Zn transport system (ATPase component)                                | ZnuC      | DR_2284                           | Dgeo_0533                         | Deide_07200                   | 0                 |
| COG1121                                                                             | ABC-type Mn/Zn transport system (ATPase component)                                | ZnuC      | -                                 | -                                 | Deide_3p02730                 | 0                 |

| COG1121                                               | ABC-type Mn/Zn transport system (ATPase component)                    | ZnuC      | -                                 | -                                  | Deide_2p01330                 | 2                 |
|-------------------------------------------------------|-----------------------------------------------------------------------|-----------|-----------------------------------|------------------------------------|-------------------------------|-------------------|
| COG1321                                               | Mn-dependent transcriptional regulator                                | TroR/DtxR | DR_2539                           | Dgeo_2268                          | Deide_00680                   | 0                 |
| COG1321                                               | Mn-dependent transcriptional regulator                                | TroR/DtxR | -                                 | -                                  | Deide_3p02021                 | 2                 |
| COG1321                                               | Mn-dependent transcriptional regulator                                | TroR/DtxR | -                                 | -                                  | Deide_3p02751                 | 0                 |
| COG1914                                               | NRAMP family transporter                                              | MntH      | DR_1709                           | Dgeo_0709                          | Deide_3p02300                 | 0                 |
| <b>B. Fe-transport and regulation related systems</b> |                                                                       |           |                                   |                                    |                               |                   |
| COG number                                            | Protein annotation                                                    | Name      | <i>D. radiodurans</i><br>ortholog | <i>D. geothermalis</i><br>ortholog | <i>D. deserti</i><br>ortholog | Spectral<br>count |
| COG0370                                               | Fe(II) transport system protein B                                     | FeoB      | DR_1219                           | Dgeo_0894                          | -                             | -                 |
| COG0609                                               | ABC-type Fe(III)-siderophore transport system (permease component)    | FepD      | DR_2589                           | Dgeo_0024                          | Deide_02150                   | 0                 |
| COG0609                                               | ABC-type Fe(III)-siderophore transport system (permease component)    | FepD      | DR_B0015                          | Dgeo_0125                          | -                             | 0                 |
| COG0609                                               | ABC-type Fe(III)-siderophore transport system (permease component)    | FepD      | DR_B0122                          | Dgeo_2758                          | Deide_2p00390                 | 0                 |
| COG0609                                               | ABC-type Fe(III)-siderophore transport system (permease component)    | FepD      | DR_B0123                          | Dgeo_2756                          | Deide_2p00370                 | 0                 |
| COG0609                                               | ABC-type Fe(III)-siderophore transport system (permease component)    | FepD      | DR_C0007                          | -                                  | -                             | -                 |
| COG0614                                               | ABC-type Fe(III)-hydroxamate transport system (periplasmic component) | BtuF      | DR_0462                           | -                                  | -                             | -                 |

|                 |                                                                       |                       |               |           |               |     |
|-----------------|-----------------------------------------------------------------------|-----------------------|---------------|-----------|---------------|-----|
| COG0614         | ABC-type Fe(III)-hydroxamate transport system (periplasmic component) | BtuF                  | DR_1373       | Dgeo_0657 | Deide_12970   | 2   |
| COG0614/COG4594 | ABC-type Fe(III)-hydroxamate transport system (periplasmic component) | HutB (FhuD-like)/FecB | -             | Dgeo_2757 | Deide_2p00380 | 1   |
| COG0614/COG4594 | ABC-type Fe(III)-hydroxamate transport system (periplasmic component) | HutB (FhuD-like)      | -             | -         | Deide_21930   | 0   |
| COG0614/COG4594 | ABC-type Fe(III)-hydroxamate transport system (periplasmic component) | HutB (FhuD-like)      | -             | Dgeo_2754 | -             | -   |
| COG0614         | ABC-type Fe(III)-hydroxamate transport system (periplasmic component) | FhuD                  | DR_B0125      | Dgeo_2753 | -             | -   |
| COG0614/COG4594 | ABC-type Fe(III)-hydroxamate transport system (periplasmic component) | FhuD                  | -             | Dgeo_1370 | Deide_17140   | 5   |
| COG0614         | ABC-type Fe(III)-hydroxamate transport system (periplasmic component) | YvrC                  | DR_2588       | Dgeo_0025 | Deide_02140   | 122 |
| COG0614         | ABC-type Fe(III)-hydroxamate transport system (periplasmic component) | YvrC-like             | DR_B0007      | Dgeo_2363 | Deide_2p01550 | 66  |
| COG0735         | Fe(II)/Zn(II) uptake regulation proteins                              | Fur (Zur)             | DR_0865       | Dgeo_0519 | Deide_16041   | 0   |
| COG0735         | Fe(II)/Zn(II) uptake regulation proteins                              | Fur                   | Upstr DR_2342 | Dgeo_2141 | Deide_19480   | 0   |
| COG0735         | Fe(II)/Zn(II) uptake regulation proteins                              | Fur                   | -             | Dgeo_2727 | Deide_2p00340 | 0   |
| COG0783         | DNA-binding ferritin-like protein (oxidative damage protectant)       | Dps                   | DR_2263       | Dgeo_0281 | Deide_21200   | 501 |
| COG0783         | DNA-binding ferritin-like protein (oxidative damage protectant)       | Dps-like (Dps92)      | DR_B0092      | -         | -             | -   |

|         |                                                                            |           |          |           |               |     |
|---------|----------------------------------------------------------------------------|-----------|----------|-----------|---------------|-----|
| COG1120 | ABC-type cobalamin/Fe(III)-siderophore transport system (ATPase component) | FepC      | DR_2590  | Dgeo_0023 | Deide_02160   | 0   |
| COG1120 | ABC-type cobalamin/Fe(III)-siderophore transport system (ATPase component) | FepC-like | DR_B0121 | Dgeo_2759 | Deide_2p00400 | 0   |
| COG1178 | ABC-type Fe <sup>3+</sup> transport system (permease component)            | ThiP      | -        | -         | Deide_19080   | 0   |
| COG1178 | ABC-type Fe <sup>3+</sup> transport system (permease component)            | ThiP      | DR_2488  | Dgeo_1934 | Deide_15850   | 0   |
| COG1840 | ABC-type Fe <sup>3+</sup> transport system (periplasmic component)         | AfuA      | -        | -         | Deide_19090   | 129 |
| COG1918 | Fe(II) transport system protein A                                          | FeoA      | DR_1220  | Dgeo_0895 | -             | -   |
| COG2375 | siderophore -interacting protein                                           | ViuB      | DR_B0017 | Dgeo_0127 | -             | -   |
| COG2375 | siderophore -interacting protein                                           | ViuB-like | DR_B0124 | -         | -             | -   |
| COG4264 | Siderophore synthetase component                                           | RhbC      | -        | -         | Deide_21890   | 1   |
| COG4264 | Siderophore synthetase component                                           | RhbC      | -        | -         | Deide_21910   | 0   |
| COG4559 | ABC-type hemin transport system (ATPase component)                         | HmuV      | DR_B0016 | Dgeo_0126 | -             | -   |
