# Supplementary material for: Alliance of Proteomics and Genomics to Unravel the Specificities of Sahara Bacterium Deinococcus deserti
Source: PLoS Genet. 2009 Mar 27;5(3):e1000434. doi: 10.1371/journal.pgen.1000434 (PMC2669436; doi:10.1371/journal.pgen.1000434)
Supplement: Table S12 — Primers for RT-PCR. (0.06 MB PDF) [file pgen.1000434.s017.pdf]

| <b>Table S12. Primers for RT-PCR</b>       |               |                         |
|--------------------------------------------|---------------|-------------------------|
| <b>Gene</b>                                | <b>Primer</b> | <b>Primer sequence</b>  |
| <i>Deide_06120</i><br>( <i>tufA</i> )      | Dd06120FW     | TTTGAGCGCACGAAGCCCCA    |
|                                            | Dd06120RV     | TGACGGGTTCGGCGTGTTGTA   |
| <i>Deide_19450</i><br>( <i>recA-C</i> )    | recAC-FW2     | AGCTACGGTGACGAGCGCAT    |
|                                            | recAC-DN      | AGCCAGGGTAAGGAAGACTGGA  |
| <i>Deide_1p01260</i><br>( <i>recA-P1</i> ) | recAP-FW2     | AGCTACGGGGACGAACGCAT    |
|                                            | recAP1-DN     | GGGCAGCGGGATTGATATTAAGG |
| <i>Deide_3p00210</i><br>( <i>recA-P3</i> ) | recAP-FW2     | AGCTACGGGGACGAACGCAT    |
|                                            | recAP3-DN     | GCCATACCAGTGACCCCGGA    |
| <i>Deide_1p00180</i><br>( <i>polB</i> )    | DdP100180FW2  | ACCTGCCGTTTCTGCATTAC    |
|                                            | DdP100180RV2  | CCAAATAGACCCGTCCTTCA    |
| <i>Deide_1p01880</i><br>(Y polymerase)     | DdP101880FW2  | TGCGTGCCAAAGCGGGAGAA    |
|                                            | DdP101880RV2  | TCGGTGCGGTGCCCTTTCAA    |
| <i>Deide_1p01900</i><br>( <i>dnaE2</i> )   | DdP101900FW   | TTGCGGTCCATTACGCCGGA    |
|                                            | DdP101900RV   | AAATGCGTGGGCGTGCGACT    |
| <i>Deide_3p02150</i><br>(photolyase-like)  | DdP302150FW   | TTTTCTGACGCCCAGCGCA     |
|                                            | DdP302150RV   | AGGACAGCGCGCACCCATTT    |
| <i>Deide_23280</i><br>( <i>ddrC</i> )      | Dd23280FW     | TCAGCTGGGCAGCATCAGCA    |
|                                            | Dd23280RV     | TGCGCGCCGTGTTCTGAAT     |
